1 **Microbial extracellular polysaccharide production and aggregate**  
2 **stability controlled by Switchgrass (*Panicum virgatum*) root biomass**  
3 **and soil water potential**

4  
5 **Yonatan Sher<sup>1\*</sup>, Nameer R. Baker<sup>1\*</sup>, Don Herman<sup>1,7</sup>, Christina Fossum<sup>1</sup>, Lauren Hale<sup>2</sup>, Xing-Xu**  
6 **Zhang<sup>3</sup>, Erin Nuccio<sup>4</sup>, Malay Saha<sup>5</sup>, Jizhong Zhou<sup>6,7</sup>, Jennifer Pett-Ridge<sup>4</sup>, Mary Firestone<sup>1,7</sup>**  
7

8 <sup>1</sup>University of California, Berkeley, CA; <sup>2</sup>USDA-Agricultural Research Service, Parlier, CA; <sup>3</sup>Lanzhou  
9 University, Lanzhou, China; <sup>4</sup>Lawrence Livermore National Laboratory, Livermore, CA; <sup>5</sup>Noble Research  
10 Institute, Ardmore, OK; <sup>6</sup>University of Oklahoma, Norman, OK; <sup>7</sup>Lawrence Berkeley National Laboratory,  
11 Berkeley, CA

12 \* equal contribution  
13

14 **Keywords: EPS, marginal soil, Stable soil aggregate, switchgrass, <sup>13</sup>C labeling.**  
15

16 **ABSTRACT**

17 Deep-rooting perennial grasses are promising feedstock for biofuel production, especially in  
18 marginal soils lacking organic material, nutrients, and/or that experience significant water stress.  
19 Perennial grass roots can alter surrounding soil conditions and influence microbial activities,  
20 particularly the production of extracellular polymeric substances composed primarily of  
21 extracellular polysaccharides (EPS). These polymers can alleviate cellular moisture and nutrient  
22 stress, and enhance soil characteristics through improved water retention and aggregate  
23 stability, the latter of which may in turn enhance carbon persistence. In this study we used a  
24 <sup>13</sup>CO<sub>2</sub> tracer greenhouse experiment to examine the effect of switchgrass cultivation on the  
25 production and origin of EPS in a marginal soil with five fertilization/water treatments (control,  
26 +N, +NP, +P, low water). Soils with both added nitrogen and phosphorus had the highest root  
27 biomass, EPS and percentage of water-stable soil aggregates. Multiple linear regression  
28 analyses revealed root biomass was the most important determinant for soil EPS production,  
29 potentially by controlling carbon supply and diurnal changes in soil water potential. Path  
30 analysis highlighted the role of soil water potential were and EPS on with water-stable soil  
31 aggregates, indicating that EPS concentration and soil aggregation have similar drivers in this  
32 soil. High mannose content confirmed the microbial origin of EPS. <sup>13</sup>CO<sub>2</sub> labeling indicated that  
33 0.18% of newly fixed plant carbon was incorporated into EPS. Analysis of field samples  
34 suggests that EPS is significantly enhanced under long-term switchgrass cultivation. Our results  
35 demonstrate that switchgrass cultivation can promote microbial production of EPS, providing a  
36 mechanism to enhance sustainability of marginal soils.

## 37 1. INTRODUCTION

38 In oligotrophic and variable moisture environments, such as those often found in  
39 marginal land soils, microorganisms can produce polymeric substances protecting them from  
40 external stresses (Cheshire, 1977; Nicolaus et al., 2010; Oades, 1984; Sandhya and Ali, 2015;  
41 Wolfaardt et al., 1999). These polymeric substances include a variety of biological polymers,  
42 such as DNA and proteins, but it has been shown that the principal components are  
43 polysaccharides (Cheshire, 1977; Hall-Stoodley et al., 2004; More et al., 2014; Oades, 1984);  
44 hence we will focus on extracellular polysaccharides (EPS). Physical and chemical  
45 characteristics of EPS can help microbial cells alleviate moisture and nutrient stress, and  
46 coincidentally affect soil characteristics in a manner that may enhance the sustainability of  
47 marginal soils. EPS can mitigate the effect of decreasing water potential on microbial cells by  
48 increasing the water content they perceive (Adessi et al., 2018; Chenu, 1993; Sandhya and Ali,  
49 2015). Enhanced soil water holding capacity can increase nutrient diffusion to and from  
50 microbial cells encased in EPS (Chenu and Roberson, 1996). The sticky, gelatinous properties  
51 of EPS also bind microbial cells to mineral surfaces in soil (Wolfaardt et al., 1999) and enhances  
52 soil-aggregation by binding soil particles together (Costa et al., 2018; Oades, 1984; Rogers and  
53 Burns, 1994) into micro-aggregates (Six et al., 2000; Six and Paustian, 2014). EPS thus  
54 enhances the formation of water-stable aggregates (Sandhya and Ali, 2015) and increases  
55 mean soil aggregate size (Amellal et al., 1999). EPS may also increase C persistence in soil, as  
56 it can be occluded in tertiary structures where it is less available for microbial consumption  
57 (Chenu and Plante, 2006; Liang et al., 2017).

58 Microbial EPS production tends to increase during dry periods, as microbes produce  
59 more EPS to enhance water retention of the surrounding soil matrix (Roberson and Firestone,  
60 1992). As such, we would expect to see more EPS produced in drier or variable moisture soil  
61 conditions. EPS production is also sensitive to changes in temperature, pH, and salinity (Ali et  
62 al., 2009; Jiao et al., 2010; Upadhyay et al., 2011). Nutrient availability is strongly correlated  
63 with microbial EPS production, as the availability of different carbon (C) sources directly  
64 influences the precursor molecules available to anabolize into EPS (Celik et al., 2008; Ghosh et  
65 al., 2011). Lack of nitrogen (N) or phosphorus (P), inferred from a high C:N ratio, has also been  
66 shown to positively affect EPS production of soil microbial isolates (Quelas et al., 2006;  
67 Roberson, 1991; Staudt et al., 2012). Thus, microbial production of EPS may be enhanced in  
68 marginal soils that inherently possess low N content, but could be limited by C availability given  
69 a lack of available organic material.

70 Cultivation of perennial grasses as cellulosic feedstocks on marginal lands is expected  
71 to have a central role in climate change mitigation (Abraha et al., 2019; Robertson et al., 2017).  
72 Perennial feedstocks also have neutral C costs, a significant benefit over the C-negative costs  
73 of other biofuels such as corn (Gelfand et al., 2011; Tilman et al., 2006). Perennial grasses such  
74 as switchgrass (*Panicum virgatum*) possess extensive rooting systems that persist over multiple  
75 growing seasons in the soil (Chimento et al., 2016; Ontl et al., 2015, 2013). Roots provide C-  
76 inputs to rhizosphere microbial communities in the form of root exudates and mucilage (Mao et  
77 al., 2014) and to the total soil community in the form of decomposing root litter (Jackson et al.,  
78 1997). These inputs could alleviate C-limitation for microbial communities in marginal soils.  
79 Perennial rooting systems can input plant C deeper into the soil profile than do annual plants,  
80 potentially increasing soil capacity to sequester C at depth (Anderson-Teixeira et al., 2009;  
81 Tilman et al., 2006). Notably, perennial grasses significantly enhance soil aggregation under  
82 long-term cultivation (Jastrow et al., 1998; Ontl et al., 2015), and aggregated soils store C more  
83 effectively than do soils lacking structure (Liao et al., 2006; McGowan et al., 2019). In addition,  
84 studies show that switchgrass (SG) biomass in the field is often not enhanced by nutrient  
85 amendments in marginal soils (Brejda, 2000; Parrish and Fike, 2005; Ruan et al., 2016), which  
86 makes its cultivation on such soils more cost-effective. This raises the question of whether there  
87 are mutualistic relationships between SG roots and their associated soil microbial community  
88 that contribute to making up the nutrient deficits in these soils (Rodrigues et al., 2017). In  
89 particular, SG may directly facilitate microbial production of EPS by providing microbes with  
90 labile C precursors (Mao et al., 2014) and indirectly enhance EPS production by altering soil  
91 water potentials through root uptake and potentially through hydraulic lift (Caldwell et al., 1998).

92 In this study we tested the hypothesis that soil microbial communities in a marginal soil  
93 produce EPS in response to limited nutrient and moisture availability. We also asked whether  
94 altered EPS production changes soil characteristics, specifically aggregate stability. We used a  
95 sandy loam soil depleted in total C, N, and P from a field site in central Oklahoma, where SG is  
96 endemic. By manipulating watering regimes and amendments of N and/or P, we assessed how  
97 nutrient availability and water stress influenced plant root biomass, EPS, and soil  
98 characteristics. We <sup>13</sup>C<sub>2</sub>-labeled the switchgrass plants for 12 days to track plant  
99 photosynthate C into EPS and bulk soil. Monosaccharide content was analyzed to determine  
100 the composition and origin of EPS. Our objective was to determine if SG cultivation can alter  
101 microbial activity to enhance beneficial soil characteristics, such as aggregate stability, that are  
102 lacking in marginal soils.

## 104 2. METHODS

### 105 Soil collection and preparation

106 Soils were collected from a pasture soil in Caddo County, OK, near the town of  
107 Anadarko (35.072417/-98.303667). The soil, described by the USDA soil series as Pond Creek  
108 fine sandy loam with 1-3 percent slopes, is classified as a superactive, thermic Pachic Argiustoll  
109 (Moffatt, 1973). We consider it to be a marginal soil because of its low C content (< 0.4% total  
110 C), low nutrient content (< 0.04% total N, < 6 ppm total P), and high (> 70%) sand content in all  
111 three observed horizons down to 1 m in depth (**Table S2**). In November of 2016, a backhoe was  
112 used to excavate 1-m deep soil pits. In this range, the soil profile was characterized as having  
113 three distinct horizons— an A horizon with noticeably more organic material in the top 25 cm, a B  
114 horizon with greater sand content from 25-70 cm, and a deeper, noticeably denser C horizon  
115 from 70 cm and below. Bulk density cores were also taken from each horizon (**Table S2**).

116 After removing living plant material from the surface (0-3 cm), approximately ~4 m<sup>3</sup> of  
117 soil was collected from each horizon using a backhoe, and transported to our greenhouse  
118 facility at the University of California, Berkeley (UCB). Soils were stored indoors and in  
119 December 2016, soil from each horizon was homogenized in a 0.255 m<sup>3</sup> cement mixer and then  
120 stored in sandbags for two months at ambient conditions (25 °C during the day and 18 °C  
121 overnight). Sub-samples were taken from each homogenized horizon for initial soil chemistry  
122 assays (**Table S2**). Bulk density cores were weighed fresh and dried at 70° C until no change in  
123 soil weight was observed to assess field bulk density of each horizon.

### 124 Mesocosm preparation

125 Based on field observations, soil profiles were re-created with homogenized soil  
126 horizons in 30 clear, impact-resistant polycarbonate cylinders (hereafter referred to as  
127 “mesocosms”), 122 cm in length and 19.7 cm in diameter. In each mesocosm, we aliquoted the  
128 A, B, and C soil to allow each horizon 33 cm of vertical depth, packed at field bulk density. At  
129 the base, each cylinder was sealed with a custom-fitted polycarbonate cap and 500 g of coarse-  
130 grained sand to provide drainage. During packing, an anion exchange resin membrane  
131 (Membranes International, Ringwood, NJ) was added to the center of each horizon to provide  
132 an integrated measure of available PO<sub>4</sub> in that horizon over the course of the study.

133 To establish five experimental treatments, before adding the A horizon soil to the  
134 mesocosm, it was mixed in a cement mixer for 2 minutes with: no additions (control and low

135 water treatments), added N (N), added P (P), or combined N and P (N/P) amendments (**Fig.**  
136 **1A**). N was added in the form of 0.13 g kg<sup>-1</sup> dry soil of ESN Smart Nitrogen slow-release coated  
137 urea (44-0-0, Agrium) in accordance with the recommendations provided by Oklahoma State's  
138 Division of Agricultural Sciences and Natural Resources for high biomass SG cultivation (Arnall  
139 et al., 2018). P was added in the form of 0.48 g kg<sup>-1</sup> slow-release rock phosphate (0-3-0,  
140 Espoma) to bring the total concentration of plant extractable P up to 20 ppm, which resulted in  
141 an amendment consistent with manufacturer recommendations as well as Oklahoma State  
142 University's recommendations for SG cultivation in soils with ~5 ppm of total phosphorus.

143 Completed mesocosms were wrapped in black high-density polyethylene sheeting and  
144 then white polypropylene sacking (to prevent soil temperatures from being elevated by solar  
145 radiation) and stored for an additional five weeks before planting with SG. Soil moisture probes  
146 (EC-20; METER Group, Pullman, WA) were installed in the A horizon of the control and low  
147 water treatments mesocosms to maintain target moisture conditions. During this period, 2 L of  
148 deionized H<sub>2</sub>O was added to each mesocosm every week to re-hydrate the soil profile and allow  
149 it to equilibrate before planting. A SG genotype, NFSG 18-01, from the Nested Association  
150 Mapping population (NAM) with established high biomass productivity in both Oklahoma and  
151 Tennessee was selected for this experiment. SG is highly heterogeneous, and every plant is  
152 genetically distinct. To avoid any genetic variation among treatments and replicates, we used a  
153 single clone for this experiment. The plant was grown in the Noble Research Institute (TRI)  
154 greenhouse at 32°C (daytime) / 21°C (nighttime) and 16 h photoperiod for maximum growth. A  
155 total of 120 clonal ramets were prepared from one plant and shipped to UCB. Uniform ramets of  
156 NFSG 18-01 were planted into each of the 30 mesocosms in early May 2017. Mesocosms were  
157 arranged in 6 wheeled stainless-steel caddies insets of five (one of each treatment, in random  
158 order), making each caddy equivalent to a "plot." Thereafter, mesocosms were watered with 100  
159 ml of deionized H<sub>2</sub>O daily—roughly equivalent to the rainfall experienced in TRI field plots in  
160 southern Oklahoma in the higher precipitation months of May and June. After plants were  
161 established within the mesocosms (four weeks), watering for the low water treatment was  
162 reduced to 50 ml of H<sub>2</sub>O daily. After eight weeks, the temperature in the green house was  
163 increased to 32 °C (daytime) / 21 °C (nighttime) to simulate growing season conditions in  
164 Oklahoma.

### 165 **<sup>13</sup>CO<sub>2</sub> pulse-chase labeling**

166 After plants had grown for 18 weeks, we performed a 12-day <sup>13</sup>CO<sub>2</sub> pulse-chase  
167 labeling. Half (15) of the mesocosms were labeled with <sup>12</sup>CO<sub>2</sub> (Praxair, Danbury, CT) as controls

168 for future stable-isotope probing (SIP) and the other half were labeled with 99 atom-percent  
169  $^{13}\text{CO}_2$  (Cambridge Isotope Laboratories, Tewksbury, MA), providing three replicates of each  
170 treatment under each labeling regime. Labeling was carried out using a custom apparatus  
171 consisting of a Picarro G2131-I Analyzer (Santa Clara, CA) and Infrared Gas Analyzer, (IRGA,  
172 Campbell Scientific, Logan, UT) combined with a CR1000 Datalogger (Campbell Scientific,  
173 Logan, UT) to enable real-time assessment of [ $^{12}\text{CO}_2$ ] and [ $^{13}\text{CO}_2$ ] in up to 32 chambers (16 of  
174 each type of  $\text{CO}_2$ ).

## 175 **Harvest of plant biomass and processing of soils for analysis**

176 At the completion of the pulse-labeling in September,  $^{13}\text{CO}_2$  enriched mesocosms were  
177 destructively harvested by clipping SG shoots at the soil surface and partitioning soil horizons  
178 for sample collection. For each individual soil horizon, roots were collected from bulk soil by  
179 hand, washed in deionized water, and dried at 70° C until no change in root weight was  
180 observed. Fresh bulk soil was aliquoted for pH, soil chemistry, and EPS extractions and stored  
181 at 4° C. Fresh bulk soil was also aliquoted for assessment of water-stable aggregates and  
182 stored in open bags in the greenhouse for air-drying. Gravimetric soil water content was  
183 measured for each horizon of each replicate by drying fresh bulk soil at 70°C until no change in  
184 soil weight was observed. Soil water content was converted to soil water potential with water  
185 retention curves that were generated from samples from each horizon using a pressure plate  
186 apparatus (WP4C, METER Environment, Pullman, WA) and a van Genuchten model to apply a  
187 non-linear fit to the data (Seki, 2007). Volumetric soil water content measured by EC-20 probes  
188 in the A horizon of the control and low water treatments was also converted to soil water  
189 potential using these water retention curves.

190 5 g soil was extracted with 20 ml 0.5M  $\text{K}_2\text{SO}_4$  to assess dissolved organic carbon (DOC)  
191 and total dissolved nitrogen (DN). DOC in the extract was measured using a Shimadzu (Kyoto,  
192 Japan) TOC-L series CSH/H-type TIC/TOC analyzer as previously described elsewhere  
193 (Jenkins et al., 2017). DN in  $\text{K}_2\text{SO}_4$  extracts was measured after combustion by detecting NO  
194 with a chemiluminescence gas analyzer. Soil pH values were determined in slurries made by  
195 mixing 5g of soil with 5ml of 0.01M  $\text{CaCl}_2$ . 1 g dried soil was sent to Oregon State University's  
196 Central Analytical Laboratory (Corvallis, OR) for total C quantification by combustion at 1150 °C  
197 on an Elemental Macro Cube.  $\text{PO}_4$  accumulation on ion exchange resin membranes was  
198 assessed by extracting anions with 0.5 M HCl and assessing the ppm of P in the extract with a  
199 microplate reader using methods described by D'Angelo et al., 2001.



## 200            **EPS extraction and analysis**

201            We used a modified cation exchange resin (CER) extraction method (Redmile-Gordon et  
202 al., 2014; Wang et al., 2019) to examine how EPS content in bulk soil differed between depths  
203 and treatments at the end of the greenhouse experiment The CER reduces binding between  
204 multivalent cations and polymeric substances (Sheng et al., 2010), releasing EPS into the  
205 extraction buffer solution. This approach minimizes microbial cell lysis that can potentially bias  
206 the results (Redmile-Gordon et al., 2014; Steinberger and Holden, 2004; Wang et al., 2019;  
207 Zhang and Yan, 2012), and maximizes extracted EPS yield (Frølund et al., 1996; Sheng et al.,  
208 2010). Combining this CER extraction with an ethanol precipitation step isolates high molecular  
209 weight carbohydrates (Chang et al., 2007), thus targeting soil carbohydrates that are both  
210 extracellular and polymeric - i.e., EPS.

211            In the modified extraction method, the extraction buffer was phosphate buffer saline  
212 (PBS; Gibco, Grand Island, NY). Specifically, 5 g soil (kept at 4°C until extraction) and 10 ml  
213 phosphate-buffered saline (PBS) were added to a 50 ml tube containing 1 g CER (Dowex®  
214 Marathon® C, 20–50 mesh, Na<sup>+</sup> form, Sigma-Aldrich, St. Louis, MO). This slurry was shaken for  
215 30 minutes at 4 °C and subsequently centrifuged at 3000 rpm for 10 minutes at 4 °C. The  
216 supernatant was passed through a 0.2 µm nylon filter, and polysaccharides were precipitated  
217 from the filtrate with three volumes of 100% ethanol and concentrated 10x.

218            To extract EPS for 13C analysis, the extraction procedure was upscaled 18x to obtain  
219 enough C in the extract to allow IRMS analysis Extracts were precipitated twice in ethanol, to  
220 reduce sample volume to 1 ml. Reduced volume extracts were transferred to small tin cups  
221 (Costech, Valencia, CA) and evaporated to complete dryness at 70°C. These tin cups were then  
222 folded into tight tin balls for IRMS analysis.

223            Total EPS was quantified by measuring carbohydrates with a sulfuric acid/phenol  
224 method (DuBois et al., 1956), modified for microplates. A colorimetric reaction mix composed of  
225 50 µl of each EPS sample (or standard), 150 µl sulfuric acid (95-98%, A300-212, Fisher  
226 Chemical), and 30 µl 5% phenol (Spectrum chemicals) were added to a 1 ml well in a 96 well  
227 polypropylene deep-well plate (Thermo Scientific Nunc, Waltham, MA, USA). Plates were tightly  
228 covered with polypropylene lid and placed on micro-plate block heater for 45 minutes at 100°C,  
229 then allowed to cool for 15 minutes. 100 µl of the mix was transferred from each well of the  
230 polypropylene plate to a clear, flat bottom, polystyrene 96 well microplate (Greiner Bio-One) and  
231 placed in Spectramax plus 384 plate reader (Molecular Devices) to measure absorbance at 490

232 nm. Carbohydrate content was measured against a calibration curve of glucose in the range of  
233 0.5-250  $\mu\text{g ml}^{-1}$ .

234 To assess the monosaccharide composition of EPS, 20  $\mu\text{g ml}^{-1}$  solutions of each EPS  
235 extract were generated. These solutions were hydrolyzed by adding an equal volume of 4M  
236 Trifluoroacetic acid (TFA; Sigma-Aldrich) to attain a 2M final concentration, before being  
237 incubated for 90 minutes at 121°C. Hydrolysates were washed twice with isopropanol by  
238 evaporating isopropanol with a TECHNE sample concentrator (Cole-Parmer Ltd., UK), and were  
239 then eluted with 0.5 ml ultrapure water. Subsequently, re-suspended samples were centrifuged  
240 for 10 minutes at 13,000 x g at 4°C, to remove solids, and 80% of the supernatant was collected  
241 for analysis. Monosaccharide composition was measured with a Dionex ICS-3000 ion  
242 chromatography system with CarboPac™ PA20 column (Thermo Fisher Scientific). Samples  
243 were analyzed in two runs with two KOH eluent concentrations, 2mM and 18mM, as at 2mM  
244 arabinose and rhamnose peaks overlap while at 18mM xylose and mannose peaks overlap  
245 (Yeats et al., 2016). We used this data to calculate the ratio of hexose to pentose sugars in  
246 extracted EPS to verify its microbial origin (Gunina and Kuzyakov, 2015; Oades, 1984). Given  
247 that it is recommended to assess EPS monosaccharide composition in the context of the plant  
248 being studied (Gunina and Kuzyakov, 2015), we also sampled SG roots from TRI's Red River  
249 field site (Burneyville, OK, 33.882235/-97.275919) in early May 2017 to calculate the hexose to  
250 pentose ratio in polysaccharides from SG root mucilage. EPS extraction, quantification and  
251 monosaccharide composition was done both on roots and bulk soil samples as described  
252 above.

### 253 **Soil aggregate stability**

254 Soil aggregate stability was measured with a wet sieving method (Kemper and Rosenau,  
255 1986) on 1-2mm soil aggregates that had been sieved from air-dried soil. 5g of these  
256 aggregates were placed on 0.25mm mesh sieve and repeatedly dunked in a water cup for 5  
257 minutes, using a mechanical dunking apparatus (Singer et al., 1992). The mass of unstable  
258 aggregates (those that dispersed) versus stable aggregates (stayed on the sieve) was dried and  
259 measured. The following ratio was used as the measure for soil aggregate stability:

$$260 \frac{\textit{stable aggregates}}{(\textit{stable aggregates})+(\textit{unstable aggregates})}$$

261 Before assessing soil aggregate water-stability, all soil samples from all treatments were air-  
262 dried and had consistent low soil water content to avoid confounding the assay.



## 263 **Phospholipid fatty acid analysis (PLFA)**

264 Microbial biomass in each soil sample was determined by Phospholipid Fatty Acid  
265 (PLFA) analysis, with a high throughput 96 well plate method to extract and trans-esterify  
266 PLFAs, as described by (Buyer and Sasser, 2012). PLFA's were extracted from 2 g dry soil  
267 samples from the greenhouse experiment, in the B and C horizons extracts of two 2 g dry soil  
268 samples were combined. After transesterification steps Fatty Acid Methyl Esters (FAMES) were  
269 then analyzed by gas chromatography (Agilent Technologies, Wilmington, DE, USA) and  
270 identified using the MIDI Sherlock Microbial Identification System (MIDI, Newark, DE, USA). An  
271 internal standard, 19:0 phosphatidylcholine (Avanti Polar Lipids, Alabaster, AL, USA) and  
272 chromatogram peaks of a PLFAD1 calibration mix and peak library (MIDI Inc, Newark, DE,  
273 USA) were used to calculate concentration of analyzed PLFA's and total microbial biomass.

## 274 **<sup>13</sup>C analysis**

275 <sup>13</sup>C in both bulk soil samples and EPS extracts from the surface horizon were analyzed  
276 with an IsoPrime 100 continuous flow isotope ratio mass spectrometer (IRMS) interfaced with a  
277 trace gas analyzer (Isoprime Ltd, Cheadle Hulme, UK). <sup>13</sup>C enrichments were calculated by  
278 subtracting <sup>13</sup>C atom% natural abundance (found in control <sup>12</sup>C treatments) from the total <sup>13</sup>C  
279 atom% found in <sup>13</sup>C treatments. <sup>13</sup>C atom% was multiplied by either total C per g soil for each  
280 soil sample, to calculating the amount of labeled soil C, or by EPS per g soil, to calculate the  
281 amount of labeled EPS.

## 282 **Oklahoma field sampling**

283 We conducted soil coring campaigns to compare EPS content along bulk soil depth  
284 profiles of long-term perennial deep-rooting SG fields (10-20 years) and adjacent annual  
285 shallow-rooting crop fields. Soil coring campaigns were conducted at TRI's Red River field site  
286 (10-year SG cultivation) and at a field site near Stillwater, OK (20-year SG cultivation,  
287 36.133378/-97.104284). Soil cores were excavated using a Giddings probe (Giddings Machine  
288 Company, Windsor, CO). Soil core tubes, ~10 cm diameter and ~1.2 m length (with a 9 cm  
289 diameter Zero Contamination system liner), were used to take out soil cores from up to ~3 m  
290 depth, for three replicate 1.2 m cores. Each 1.2 m core was cut into three sections of ~30 cm,  
291 and soil from the bottom 20 cm of each section was stored at 4°C for one week before EPS was  
292 extracted and quantified (as described above).

## 293 **Statistical analysis**

294 Statistical analysis and data visualization were conducted with R version 3.6.0 (R Core  
295 Team, 2018). Significant differences in soil properties and SG root biomass between treatments  
296 and soil horizons for the greenhouse study and differences in EPS content between SG and  
297 annual crop fields with depth were determined by ANOVA. Every two adjacent depths from the  
298 field samplings were combined during analysis to increase statistical power. Significant  
299 differences in microbial biomass between treatments and soil horizons were assessed for the A  
300 and B horizon only, given the prevalence of N/A results for PLFA microbial biomass in the C  
301 horizon. For further multiple comparisons between treatments and soil horizons, pairwise t-tests  
302 were conducted without pooled standard deviations (Welch's t-test), as the assumption of equal  
303 variance between samples for Tukey's test were not met for some of the analyses. To correct  
304 for multiple testing, the Benjamini-Hochberg correction was used (Benjamini and Hochberg,  
305 1995). Box-whisker graphs were built with the ggplot2 package (Wickham, 2016) in R.  
306 Significant differences in EPS monosaccharide composition as a result of treatment were  
307 determined by MANOVA.

308 To determine which measured properties best explain EPS and soil aggregate stability  
309 variability between treatments and horizons, we employed multiple linear regression analysis.  
310 Multicollinearity between examined factors was detected by calculating the variance inflation  
311 factor (VIF) between them (Fox and Weisberg, 2011), and removing highly correlated factors  
312 with VIF value above 3 (Zuur et al., 2010) in a stepwise manner. After removing highly  
313 correlated factors, factors with low explanatory significance to the multiple linear regression  
314 models were removed after Akaike information criterion (AIC) estimation of the relative quality of  
315 the models (Venables and Ripley, 2002). Correlation between factors was visualized with  
316 correlation matrix charts (Peterson et al., 2018) (presented in the Supplemental Online).

317 We used path analysis, conducted with the lavaan package (Rosseel, 2012) in R, to  
318 assess how root biomass and other measured soil factors interact to affect observed EPS  
319 content and the percentage of water-stable aggregates. Although path analysis is built for larger  
320 sample sizes than we have in our study, it provides conservative fit estimates and is not prone  
321 to Type 1 errors (Shipley, 2016). Using a workflow based on that presented in (Petersen et al.,  
322 2012), we developed a full model of interacting paths between root biomass, soil water  
323 potential, pH, microbial biomass, DOC, DN, PO<sub>4</sub> accumulation, EPS content, and the  
324 percentage of water-stable aggregates based on theoretical linkages between the relevant  
325 measured variables (**Figure S4**). We iteratively removed non-significant edges between the  
326 measured soil factors ( $p < 0.1$ ) from the resulting path model until all edges were significant,  
327 and evaluated the fit of this reduced model to the data using a  $X^2$  test and the Tucker-Lewis

328 index. Visualization of the resulting path analysis was performed using the *semPlot* package  
329 (Epskamp, 2019) in R.

330

### 331 **3. RESULTS**

#### 332 **EPS and soil factors**

333 EPS concentrations in mesocosm soils after 143 days of SG growth varied significantly  
334 as a function of both treatment (ANOVA,  $F = 5.16$ , D.F. = 4,  $P = 0.001$ ) and depth (ANOVA,  $F =$   
335  $238$ , D.F. = 2,  $P < 0.001$ ; **Fig. 2A**). In all treatments, EPS content was greatest in the surface A  
336 horizon; ranging from  $11.74 \pm 2.04 \mu\text{g g}^{-1}$  (mean  $\pm$  SD) in the A horizon to  $6.99 \pm 1.60 \mu\text{g g}^{-1}$  and  
337  $2.28 \pm 1.43 \mu\text{g g}^{-1}$  in the B and C horizons, respectively (**Fig. 2A**). EPS content only differed  
338 between treatments in the A horizon (ANOVA,  $F = 8.24$ , D.F. = 4,  $P < 0.001$ ; **Fig. 2A**), and  
339 these differences were primarily driven by the enhanced EPS content observed in the NP  
340 treatment relative to all other treatments (Welch's t-tests,  $P < 0.025$ ).

341 Root biomass exhibited similar trends as EPS - the greatest root biomass was observed  
342 in the A horizon, with reduced biomass in the B and C horizons (**Fig. 2B**). Root biomass varied  
343 significantly by treatment in the A horizon (ANOVA,  $F = 9.64$ , D.F. = 4,  $P < 0.001$ ; **Fig. 2B**), and  
344 was highest in the NP treatment. Root biomass also varied significantly by treatment in the B  
345 horizon (ANOVA,  $F = 12.36$ , D.F. = 4,  $P < 0.001$ ; **Fig. 2B**), mostly as a result of higher root  
346 biomass observed in fertilized treatments.

347 DOC exhibited similar trends to both EPS and root biomass: DOC was highest and  
348 varied significantly between treatments in the A horizon; it was significantly highest in the N and  
349 NP treatments relative to all the others (Welch's t-tests,  $P < 0.019$ ) (**Fig. S1A**). DN was  
350 significantly higher in the A and B horizon of both nitrogen-amended treatments. DN was also  
351 significantly higher in the N treatment relative to the NP treatment, possibly indicating greater  
352 demand for N in the higher root biomass NP treatment (**Fig. S1B**). Accordingly, N fertilized  
353 treatments had the lowest ratios of DOC to DN (dissolved C/N, **Fig. S1C**). In the A horizon, the  
354 N and NP treatments had significantly lower pH than non-N treatments (**Fig. S1D**). In all three  
355 soil horizons, soil water potential (measured at the time of the destructive harvest) was  
356 significantly lower in both N-fertilized treatments and the low-watering regime treatment relative  
357 to the control and P treatments (**Fig. S1E**). PLFA-measured microbial biomass was significantly  
358 affected by soil depth, with minimal biomass in the B horizon and barely detectable biomass in

359 the C horizon ( $F = 349$ , D.F. = 1,  $P < 0.001$ ). We did not observe significant treatment effects on  
360 microbial biomass across horizons ( $F = 2.43$ , D.F. = 4,  $P = 0.065$ ; **Fig. S1F**) or within the  
361 surface horizon ( $F = 1.03$ , D.F. = 4,  $P = 0.414$ ).

362 We compared the influence of measured soil properties on EPS across all treatments  
363 and horizons using multiple linear regression. Many factors were significantly correlated with  
364 one another (**Fig. S2, S3**); the most collinear factors were removed from the analysis according  
365 to their VIF (as explained in the Methods section). The resulting model explains a large  
366 proportion of the variation in EPS ( $R^2 = 0.799$ ) between treatments and horizons; root biomass,  
367 soil water potential, DN and microbial biomass were the most significant explanatory factors ( $P$   
368 = 0.010, 0.034, 0.010 and  $< 0.001$ , respectively; **Table 1**). Because our dependent variable,  
369 EPS, only varied significantly between treatments in the A horizon, we did not investigate  
370 interactions between treatment and depth in other variables, and we employed a second model  
371 for only the A horizon. This model also succeeded in capturing a majority of the variability in  
372 observed EPS between treatments ( $R^2 = 0.667$ ); root biomass was again the most significant  
373 factor ( $P < 0.001$ ), and soil water potential and pH were additional significant factors ( $P = 0.007$   
374 and 0.009, respectively). A final model was developed with N addition included as a  
375 confounding factor to account for decreases in pH as a result of N fertilization (**Fig. S1D**). In this  
376 model root biomass and soil water potential were the most significant factors controlling EPS ( $P$   
377  $< 0.001$  and  $P = 0.017$ , respectively), and pH was no longer significant ( $P = 0.198$ ).

### 378 **$^{13}\text{C}$ -labeled EPS and total soil carbon**

379 To assess the proportion of total soil C that was EPS, we expressed soil EPS content as  
380 a fraction of total soil C. We found ~0.3% of soil carbon is EPS, with no significant differences  
381 between treatments and horizons. Dividing the  $^{13}\text{C}$ -labeled C observed in EPS by the total  $^{13}\text{C}$ -  
382 labeled C found in the bulk soil (**Table S2**) revealed that 0.18% of newly-fixed plant-derived C in  
383 soil was or had been assimilated into EPS. There were no significant differences in the  
384 proportion of freshly fixed C recovered in EPS between treatments. We obtained this data only  
385 for the A horizon, as a substantial amount of soil was needed to extract sufficient EPS for  $^{13}\text{C}$   
386 IRMS analysis and significant differences in EPS content were not found between treatments in  
387 the B and C horizon.

### 388 **EPS monosaccharide composition**

389 We analyzed the monosaccharide composition of soil EPS in the A horizon to assess its  
390 potential origin by calculating the ratios of recovered galactose + mannose (G+M, microbially

391 derived) to arabinose + xylose (A+X, plant derived). We found this ratio to be consistently above  
392 the accepted cutoff of 2.00 in our samples (average of  $3.92 \pm 0.25$ ), indicating EPS had a likely  
393 microbial origin (Chenu, 1995; Gunina and Kuzyakov, 2015; Oades, 1984). The observed ratio  
394 was significantly lower in the A horizon of the NP, N and low-watering regime treatments relative  
395 to the control and P treatments ( $(3.78 \pm 0.19, \text{mean} \pm \text{SD across treatments})$  vs.  $(4.14 \pm 0.15)$ ,  
396 respectively;  $P < 0.02$ ) (**Table S3**). Given that SG root mucilage itself appears to have high  
397 galactose content resulting in a  $(G+M)/(A+X)$  ratio of  $1.45 \pm 0.17$ , we also employed a more  
398 conservative  $M/(A+X)$  ratio to confirm that the majority of the EPS we extracted was most likely  
399 microbial in origin. Recovered EPS still had a value above 2.00 with this modified ratio ( $2.24 \pm$   
400  $0.13$ , on average), giving us confidence in our prior conclusion. This more conservative ratio did  
401 not differ between treatments in the A horizon. Monosaccharide composition was found to vary  
402 significantly as a result of treatment (MANOVA  $F = 6.34$ , D.F. = 20,  $P < 0.001$ ).

### 403 **Soil aggregate stability and relationship to measured variables**

404 We measured the percentage of aggregates that were water-stable to assess the effects  
405 of treatment and EPS content on soil aggregation. The percentage of water-stable aggregates  
406 was significantly higher in the NP treatment (**Fig. 3**), and we measured a significant positive  
407 correlation between soil EPS and the percentage of water stable aggregates (Pearson  $R = 0.44$ ,  
408  $P = 0.017$ ; **Fig. S3**).

409 We conducted path analysis to determine how root biomass and our observed soil  
410 characteristics may interact to impact both EPS content and the percentage of water-stable  
411 aggregates in our mesocosms. Our full model (including all of the soil variables measured) fit  
412 the data well according to the model chi-squared statistic ( $\chi^2 = 5.474$ , D.F. = 4,  $P = 0.242$ ), as  
413 did the reduced model where we removed non-significant edges ( $\chi^2 = 14.066$ , D.F. = 21,  $P =$   
414  $0.867$ ). The Tucker-Lewis index, which is more sensitive to the number of parameters included  
415 in the analysis, indicated that our reduced model fit the data very well (TLI = 1.105, above the  
416 0.9 threshold). Given that the reduced model is a nested variant of the full model, we verified  
417 that the reduced model did not fit the data in a significantly different manner from the full model  
418 using a maximum likelihood ratio test ( $\chi^2$  difference = 8.592, D.F. = 17,  $P = 0.952$ ). The reduced  
419 model shows that root biomass affects soil EPS content both directly and through the DOC pool,  
420 whereas soil water potential acts separately on both EPS and the percentage of water-stable  
421 aggregates (**Fig. 4**). Soil aggregation is also affected by pH. In addition, EPS and water-stable  
422 aggregates co-vary positively with one another.

## 423            **EPS in soil core field sampling**

424            To assess the impact of deep-rooted perennial grass cultivation on field stocks of soil  
425 EPS, replicate soil cores were collected from 10- and 20-year-old SG marginal soil fields in  
426 Oklahoma and compared with cores from adjacent fields that had been historically managed  
427 with rye (Red River) or wheat and sorghum (Stillwater) row crops under consistent tillage.  
428 Significantly larger stocks of EPS were observed in the SG field soils compared to those  
429 observed under annual crops (Red River  $F = 11.58$ , D.F. = 4,  $P < 0.001$ ; Stillwater  $F = 14.88$ ,  
430 D.F. = 4,  $P < 0.001$ ; **Fig. 5**). This significant enhancement of EPS content extended over 1.5 m  
431 deep in the soil, with concentrations of  $\sim 10 \mu\text{g g}^{-1}$  in the surface layers and  $\sim 2 \mu\text{g g}^{-1}$  below 180  
432 cm depth soil samples (Red River  $F = 2.46$ , D.F. = 4,  $P = 0.062$ ; Stillwater  $F = 4.43$ , D.F. = 4,  $P$   
433 = 0.005; **Fig. 5**).

434

## 435    **4.    DISCUSSION**

### 436    **Nutrient and water treatment effects on switchgrass root biomass and EPS**

437            Our results demonstrate that SG root biomass is a major driver of soil EPS content  
438 under abiotic stress in our marginal soil. Water stress is also a significant driver of soil EPS  
439 content (**Table 1**) and the EPS produced under water stress may improve water-stable  
440 aggregation in a marginal soil (**Fig. 3**). However, our results did not support our hypothesis that  
441 soil microbes exposed to greater nutrient limitation would produce more EPS. Instead, we found  
442 that the most important factor affecting EPS production was SG root biomass, which itself was  
443 enhanced by fertilization with N and P (**Fig. 2**). Our observation that dissolved C:N ratios are  
444 negatively correlated with EPS (**Fig. S2, S3**) contrasts with previous findings that high C:N  
445 ratios enhanced EPS production (Pal and Paul, 2013; Roberson, 1991; Sheng et al., 2006, p.  
446 200; Wang and Yu, 2007). However, these previous studies were performed with microbial  
447 isolates in culture rather than direct soil observations. Data about microbial EPS production in  
448 response to N limitation in soil is scarce, though it has been shown that specific N management  
449 practices can increase or decrease the quantity of EPS-like carbohydrates bound to the soil  
450 heavy fraction, depending on the quantity of N added (Roberson et al., 1995).

451            More recently, Redmile-Gordon et al. showed that high C availability increased soil  
452 extracellular polysaccharide content (Redmile-Gordon et al., 2015). This suggests that the  
453 availability of C precursors for EPS production may be the limiting factor in soil environments, a



454 condition that is likely important in marginal soils with low C content. We have evidence that  
455 enhanced root biomass may have provided C precursor compounds to the soil microbiota  
456 (Cheng and Gershenson, 2007; Zhalnina et al., 2018), as DOC was enhanced in treatments that  
457 had high root biomass and EPS (**Fig. S1A**). Root biomass and DOC also had the highest  
458 correlation coefficients of any measured variables with EPS content across all treatments in the  
459 A horizon, (Pearson  $R > 0.68$ ; **Fig. S3**), and were also significantly correlated with one another  
460 (Pearson  $R = 0.51$ ; **Fig. S3**). Our path analysis also provides support for this hypothesis, as root  
461 biomass influenced EPS strongly through the DOC pool (**Fig. 4**). We should note that our  
462 measurements of DOC and EPS likely overlap to some extent, although our EPS extraction  
463 method targets polymeric carbohydrates bound within the soil matrix (Wang et al., 2019) while  
464 DOC assays target soluble C compounds.

465 While several field studies suggest that SG productivity is relatively insensitive to N-  
466 fertilization (Brejda, 2000; Pedroso et al., 2011; Ruan et al., 2016; Thomason et al., 2005), SG  
467 root biomass clearly responded to the NP treatment in our soil. This is not entirely surprising  
468 given the highly N- and P-deplete character of the marginal soil used in this experiment (**Table**  
469 **S2**). The literature suggests there are threshold values of N availability, below which N  
470 amendment can enhance SG biomass (McGowan et al., 2018; Vogel et al., 2002). It is also  
471 possible that P-limitation may have played a role in the lack of SG biomass response to our N-  
472 only amendment; we observed a higher increase in root biomass in our +NP treatment relative  
473 to the +N treatment (**Fig. 2A**), and higher levels of dissolved N consumption in the +NP  
474 treatment (**Fig. S1B**).

475 Root biomass may also alter EPS production by reducing soil water potential and  
476 increasing its diurnal variability (Caldwell et al., 1998; Kirkham, 2005) such that EPS production  
477 may have been promoted by increased water stress (Roberson and Firestone, 1992). Indeed,  
478 the next most significant predictors for EPS production in the A horizon were soil water potential  
479 and pH (**Table 1**). The role of pH is likely a by-product of our coated urea N amendment, which  
480 likely provided ammonia for nitrifying bacteria to oxidize, releasing protons and acidifying the  
481 soil in the process (Robertson and Groffman, 2015; Zhu et al., 2016). For this reason, we also  
482 employed a multiple linear model to assess EPS variability between A horizon samples that  
483 accounts the effects of N amendment (i.e., changes in pH solely due to fertilization). Once “N  
484 amendment” is controlled for as a factor, the effect of pH on EPS drops out as a significant  
485 predictor, leaving only root biomass and soil water potential (**Table 1**).

486 The role of EPS in enhancing microbial resistance to low water potential has been  
487 extensively discussed in the literature (Costa et al., 2018; Or et al., 2007; Schimel, 2018), with  
488 most data derived from studies on isolates (Chang et al., 2007; Ophir and Gutnick, 1994;  
489 Roberson and Firestone, 1992). In our study, soil water potential was significantly correlated  
490 with EPS content, in a manner consistent with previous research on the effects of water stress  
491 on microbial EPS production (Roberson and Firestone, 1992; Sandhya and Ali, 2015).  
492 Furthermore, a recent study of EPS accumulation in soil found that EPS production was  
493 reduced in plots that received more water (Marchus et al., 2018); when plant cover was  
494 removed from wetter plots, less EPS was observed. It is well known that actively  
495 evapotranspiring plants with dense root systems can cause daily changes in soil water potential  
496 (Caldwell et al., 1998; Kirkham, 2005). Though our soil water potential measurements at harvest  
497 were unable to capture these diel dynamics, we did make continuous soil water potential  
498 measurements in our control and low water treatments for the 12 days when they were being  
499 labeled with  $^{12}\text{C}$  or  $^{13}\text{C}$   $\text{CO}_2$  (and not being watered) (**Fig. S5**). These data show the daily  
500 changes in soil water potential that occurred solely because of root uptake and  
501 evapotranspiration, and indicate that 1) our mesocosms experienced diurnal variation in soil  
502 water potentials in the A horizon, and 2) there was a greater amplitude in this diurnal variation in  
503 soils that were drier (**Fig. S5**).

#### 504 **Quantifying soil EPS and validating its microbial origin**

505 The quantity of EPS we recovered is low compared to some previous studies, reaching  
506 maximum values of  $14.6 \pm 1.6 \mu\text{g g}^{-1}$  in the A horizon of the NP treatment (**Fig. 2A**). Recovered  
507 EPS was significantly lower in the two deeper soil horizons, and did not vary between  
508 treatments at those depths, mirroring the lower microbial biomass in the deeper horizons (**Table**  
509 **1; Figure S1F**). In a recent watering manipulation experiment in an annual grassland,  
510 significantly higher amounts of EPS were recovered ( $150\text{-}300 \mu\text{g g}^{-1}$ ) using a hot-water  
511 extraction method (Marchus et al., 2018). Our choice of extraction method is unlikely the cause  
512 of our lower values, however, as our observed EPS content is also noticeably reduced relative  
513 to the  $170\text{-}460 \mu\text{g g}^{-1}$  from another annual grassland extracted using the same CER technique  
514 (Redmile-Gordon et al., 2014). Instead, the low microbial biomass (**Fig. S1F**), very low total  
515 carbon content (**Table S2**) and the low availability of DOC (**Fig. S1A**) in our marginal soil likely  
516 constrained the amount of EPS that could be produced by local microbial communities. After  
517 converting to similar microbial biomass units (Bailey et al., 2002), we found noticeably lower  
518 ( $\sim 70 \mu\text{g C g}^{-1}$ ) microbial biomass in our soil than did Marchus et al. ( $\sim 200\text{-}300 \mu\text{g C g}^{-1}$ ).  
519 Notably, that study also found significant correlation between microbial biomass and EPS

520 content (Marchus et al., 2018). Carbohydrate content and microbial biomass vary extensively  
521 across soil types; while our soils have low microbial biomass and EPS content, our observed  
522 values fall well within the wide range found in a study of 108 arable, grassland, and forest soils  
523 (Joergensen et al., 1996).

524         Given that switchgrass root biomass was the strongest determinant of soil EPS content,  
525 we wanted to know whether the EPS being produced was of direct plant origin or derived from  
526 soil microorganisms that were utilizing carbon-rich exudates released by roots. We assessed  
527 the likely origin of EPS by comparing the ratio of common hexose sugars associated with  
528 microbial EPS—galactose and mannose—to common pentose sugars associated with plant  
529 mucilage—arabinose and xylose. The value of the galactose + mannose / arabinose + xylose  
530 ratio we measured ( $3.9 \pm 0.2$ , **Table S3**) indicates that most of the polysaccharides within the  
531 EPS we extracted were microbial in origin (Oades, 1984). However, a recent meta-analysis  
532 suggests that different plant species may vary significantly in the contribution of galactose to  
533 their polysaccharide content, and recommends that polysaccharide ratios be developed  
534 specifically for the plants employed in a study (Gunina and Kuzyakov, 2015). We assessed SG  
535 root mucilage and found that its galactose content is quite high, so we removed galactose from  
536 the hexose:pentose ratio for a more conservative index. Our resulting ratio ( $2.24 \pm 0.13$ ) still  
537 exceeds the commonly accepted threshold value of 2.00, giving us some confidence that EPS  
538 produced over the course of our study is primarily microbial in origin (**Table 1, Fig. 2**).

### 539         **Soil aggregate stability controlled by same factors as EPS production**

540         The formation of water stable aggregates is considered a positive indicator for both soil  
541 health and C sequestration (Costa et al., 2018; Rinot et al., 2019; Six et al., 2000; Six and  
542 Paustian, 2014). The possibility that microbial polysaccharides can increase soil aggregation  
543 was suggested as early as the 1940s (Martin, 1946). EPS is hypothesized to contribute to soil  
544 aggregation by providing an adhesive to “glue” soil particles together, increasing both the size  
545 and stability of soil aggregates (Tisdall and Oades, 1982). Soil aggregate stability has also been  
546 previously linked to the presence of SG roots (McGowan et al., 2019; Tiemann and Grandy,  
547 2015), and there is significant evidence that perennial grasses can enhance soil aggregation  
548 (Chimento et al., 2016; McGowan et al., 2019; McLauchlan et al., 2006; O'Brien and Jastrow,  
549 2013). Dense root systems such as those under perennial grasslands may enhance the wetting  
550 and drying cycles of soil (as they did in our study; **Fig. S5**), which can also enhance aggregate  
551 stability depending on the type of clays present (Singer et al., 1992). Our results show that the  
552 percentage of soil aggregates that are water-stable is significantly correlated with EPS content

553 (Pearson  $R = 0.44$ ;  $P < 0.05$ ), which itself is best predicted by root biomass, but pH and soil  
554 water potential were found by path analysis to be the best predictors of aggregate stability  
555 (**Table S1**). This suggests that soil conditions which regulate microbial EPS production are also  
556 the primary controllers for aggregate stability in our study.

557 The results from path analysis (**Fig. 4**) support the conclusion that root biomass exerts  
558 strong control over EPS content both directly and indirectly (through the DOC pool), while soil  
559 water potential exerts direct control over both EPS content and aggregate stability. Furthermore,  
560 aggregate stability and EPS content co-vary, a plausible result given that EPS is thought to  
561 promote aggregate stability while aggregates themselves can occlude soil organic C (Jastrow et  
562 al., 2007; Six et al., 2002, 2000). We found that EPS monosaccharide composition varied  
563 between our treatments ( $F = 6.34$ , D.F. = 20,  $P < 0.001$ ), but further studies are required to  
564 determine if differences in EPS composition can affect the formation of water-stable aggregates.  
565 Soil pH is often overlooked as a factor that can contribute to soil aggregation (Sollins et al.,  
566 1996), but it was also a significant controller of aggregate stability according to our path  
567 analysis. There is prior evidence from tropical soils that low pH can enhance aggregate stability  
568 (Idowu, 2003; Russell et al., 2018), and some studies suggest that increased soil pH enhances  
569 clay dispersion and reduces aggregate stability (Amézketa, 1999).

#### 570 **Carbon flow from plant photosynthate into microbial EPS**

571 Our results provide evidence of microbial incorporation of C into extracellular  
572 polysaccharides, but the total amount of EPS in our mesocosms was lower than that found in  
573 other studies. Estimates of carbohydrate content in various soils range up to 10% of total C  
574 (Cheshire, 1979), but we observed that the EPS found in our marginal soil after incubation with  
575 SG formed only 0.3% of the total soil C pool (**Fig. 2A** and **Table S2**). However, because this  
576 fraction of the soil C pool was responsive to our treatments and appeared to exert some control  
577 over the formation of water-stable aggregates, it highlights the importance of assessing EPS  
578 stocks in soils. This may be particularly true in marginal soils, where the overall depletion of  
579 organic C in the surrounding soil environment may enhance the effect of a small pool of actively  
580 synthesized polysaccharides that can alter soil characteristics and microbial viability.

581 The  $^{13}\text{CO}_2$ -labeling in our study allowed us to determine that after 12 days of plant  
582 exposure to  $^{13}\text{CO}_2$ ,  $4.39 \pm 3.72 \mu\text{g g}^{-1}$  of total soil C contained  $^{13}\text{C}$ , with no significant differences  
583 between treatments ( $n = 3$  for each treatment).  $^{13}\text{C}$  content in EPS per gram of soil reached  
584 much lower values of  $0.006 \pm 0.003 \mu\text{g g}^{-1}$ , with the least enriched EPS observed in the low

585 water treatment and the most enriched EPS observed in the +N treatment ( $0.003 \pm 0.001$  and  
586  $0.009 \pm 0.001 \mu\text{g g}^{-1}$ , respectively). This indicates that alleviating N-limitation may free the plant  
587 to provide photosynthate C to the microbial community, whereas under water-stress, SG may  
588 reduce C flow to the rhizosphere. The ratio between labeled EPS to the total  $^{13}\text{C}$  labeled soil C  
589 was  $\sim 0.18\%$ , with no significant differences between treatments. This ratio indicates how much  
590 of the recently fixed C exuded from the roots into the soil was incorporated into EPS by soil  
591 microorganisms during the 12 days of labeling at the end of the plant growth period. To our  
592 knowledge, no other studies have examined the fraction of EPS produced using freshly fixed  
593 plant photosynthate, making it difficult to place our results in context. Future experiments taking  
594 advantage of isotope-enabled approaches and labeling systems that have emerged during the  
595 last decade (Pett-Ridge and Firestone, 2017) will enable us to evaluate the magnitude of this  
596 ratio and how this aspect of plant-microbe interaction may vary between plant species, soil  
597 types and abiotic stress conditions.

#### 598 **Higher EPS in SG fields than adjacent annual grass fields**

599 The data collected from our greenhouse study highlight how SG roots may modify soil  
600 conditions to enhance microbial EPS production, and establish that SG photosynthate C can be  
601 found in EPS recovered from a marginal soil. However, this data represents greenhouse  
602 conditions over a limited period of time ( $< 1$  growing season). Several studies have established  
603 that soil organic C is generally enhanced under long-term SG cultivation when compared to  
604 paired annual crop fields (Chimento et al., 2016; Dou et al., 2013; Ma et al., 2000; McGowan et  
605 al., 2019), but we are not aware of other studies assessing EPS stocks under SG. To assess  
606 the field-relevance of our greenhouse study, we determined EPS in soils under long-term ( $>8$   
607 years) SG cultivation vs. long-term annual crop cultivation at two marginal soil sites in  
608 Oklahoma. Our results clearly indicate that SG cultivation enhances stocks of EPS (**Fig. 5**), and  
609 these enhanced EPS stocks extend more than a meter deep within the soil profile. Root density  
610 was also significantly enhanced down to at least 30 cm deep under SG compared to annual  
611 crops (data not shown). This indicates that SG cultivation can have significant effects on soil C  
612 characteristics much deeper than annual plants appear to reach. If these effects are related to  
613 those observed in our greenhouse experiment, then increased EPS under SG cultivation in the  
614 field could be indicative of (or a driver of) increased soil aggregation. Enhanced aggregation  
615 could then provide a mechanism for the persistence of C under SG cultivation (Liao et al., 2006;  
616 McGowan et al., 2019). While the overall sustainability of SG cultivation is a function of many  
617 agricultural ecosystem characteristics (trace gas production, fertilization and associated N and P

618 loss to water systems, etc.), the long-term impacts on soil C retention and soil structure are  
619 important indices of ecosystem sustainability.

## 620 **5. CONCLUSIONS**

621 We found that SG cultivation can enhance microbial EPS production in a marginal soil.  
622 SG root biomass enhances the availability of organic C compounds, providing precursors for  
623 microbial EPS production. Root biomass and soil water potential combined to exert significant  
624 control over microbial EPS production as well as water-stable aggregate formation. Growing  
625 roots absorb water from the soil, providing a mechanism for indirect root enhancement of  
626 microbial EPS production and water-stable aggregation formation. We also found evidence of  
627 significantly enhanced EPS stocks under long-term SG plots in two field plots, suggesting that  
628 these mechanisms could be broadly relevant. Our results add to a growing consensus that SG  
629 cultivation can significantly enhance soil characteristics that are of great import to proponents of  
630 soil health, especially for marginal lands. More research is required to determine how microbial  
631 communities under SG process rhizodeposits into EPS and how this EPS translates to  
632 beneficial soil characteristics, as well as broader scale field-studies to assess at what rates EPS  
633 accumulates under relevant land management practices.

634

## 635 **Acknowledgments**

636 This research is based upon work supported by the U.S. Department of Energy Office of  
637 Science, award DE-SC0014079 to UC Berkeley and subcontracts to the Noble Research  
638 Institute, the University of Oklahoma and Lawrence-Livermore National Laboratory (award  
639 SCW1555). Work at LLNL was conducted under the auspices of DOE Contract DE-AC52-  
640 07NA27344. YS was supported by postdoctoral fellowship grant no. 2016-67012-24717 from  
641 the USDA National Institute of Food and Agriculture. We thank David Orme for allowing us to  
642 collect soil from his ranch in Anadarko Oklahoma, and Hugh Aljoe, Kelly Craven and Shawn  
643 Norton for facilitating site access and soil collection. We thank Yanqi Wu for the opportunity to  
644 sample Oklahoma State's field site near Stillwater, OK. The custom  $^{13}\text{CO}_2$  labeling system was  
645 designed by Don Herman. Thanks also to Katerina Estera-Molina, Anne Kakouridis, Sarah  
646 Baker, Steve Blazewicz, Evan Starr, Ka Ki Law, Mengting Yuan, Heejung Cho, Alexa Nicholas,  
647 Eoin Brodie, Peter Nico, Caleb Herman, Ashley Campbell, and Amrita Bhattacharyya for their  
648 help with the destructive harvest of mesocosms; Yuan Wang, Na Ding, Travis Simmons, Josh



649 Barbour, Mellisa McMahon, Jialiang Kuang, Colin Bates, Ryan Gini and Noah Sokol for their  
650 help with deep core soil sampling; Madeline Moore, David Sanchez, Cynthia-Jeanette Mancilla  
651 and Ilexis Jacoby for their help with processing and soil chemical analyses; and Trent Northen  
652 and Kate Zhalnina for their help with TOC/TN analysis.

653

## 654 **6. REFERENCES**

- 655 Abraha, M., Gelfand, I., Hamilton, S.K., Chen, J., Robertson, G.P., 2019. Carbon debt of field-  
656 scale conservation reserve program grasslands converted to annual and perennial  
657 bioenergy crops. *Environmental Research Letters* 14, 024019. doi:10.1088/1748-  
658 9326/aafc10
- 659 Adessi, A., Cruz, R., Carvalho, D., Philippis, R.D., Branquinho, C., Marques da Silva, J., 2018.  
660 Microbial extracellular polymeric substances improve water retention in dryland  
661 biological soil crusts. *Soil Biology and Biochemistry* 116, 67–69.  
662 doi:10.1016/j.soilbio.2017.10.002
- 663 Ali, Sk.Z., Sandhya, V., Grover, M., Kishore, N., Rao, L.V., Venkateswarlu, B., 2009.  
664 *Pseudomonas* sp. strain AKM-P6 enhances tolerance of sorghum seedlings to elevated  
665 temperatures. *Biology and Fertility of Soils* 46, 45–55. doi:10.1007/s00374-009-0404-9
- 666 Amellal, N., Bartoli, F., Villemin, G., Talouizte, A., Heulin, T., 1999. Effects of inoculation of  
667 EPS-producing *Pantoea agglomerans* on wheat rhizosphere aggregation. *Plant and Soil*  
668 211, 93–101. doi:10.1023/A:1004403009353
- 669 Amézketa, E., 1999. Soil Aggregate Stability: A Review. *Journal of Sustainable Agriculture* 14,  
670 83–151. doi:10.1300/J064v14n02\_08
- 671 Anderson-Teixeira, K.J., Davis, S.C., Masters, M.D., Delucia, E.H., 2009. Changes in soil  
672 organic carbon under biofuel crops. *GCB Bioenergy* 1, 75–96. doi:10.1111/j.1757-  
673 1707.2008.01001.x
- 674 Arnall, B., Jones, J., Pugh, B., Rocateli, A., Sanders, H., Warren, J., Zhang, H., 2018. Oklahoma  
675 Forage and Pasture Fertility Guide. Oklahoma State University, Stillwater, OK.
- 676 Bailey, V.L., Peacock, A.D., Smith, J.L., Bolton, H., 2002. Relationships between soil microbial  
677 biomass determined by chloroform fumigation–extraction, substrate-induced respiration,  
678 and phospholipid fatty acid analysis. *Soil Biology and Biochemistry* 34, 1385–1389.  
679 doi:10.1016/S0038-0717(02)00070-6
- 680 Benjamini, Y., Hochberg, Y., 1995. Controlling the False Discovery Rate: A Practical and  
681 Powerful Approach to Multiple Testing. *Journal of the Royal Statistical Society: Series B*  
682 (Methodological) 57, 289–300. doi:10.1111/j.2517-6161.1995.tb02031.x
- 683 Brejda, J.J., 2000. Fertilization of Native Warm-Season Grasses, in: *Native Warm-Season*  
684 *Grasses: Research Trends and Issues*, CSSA Special Publication. Crop Science Society  
685 of America and American Society of Agronomy, Madison, WI, pp. 177–200.  
686 doi:10.2135/cssaspecpub30.c12
- 687 Buyer, J.S., Sasser, M., 2012. High throughput phospholipid fatty acid analysis of soils. *Applied*  
688 *Soil Ecology* 61, 127–130. doi:10.1016/j.apsoil.2012.06.005
- 689 Caldwell, M.M., Dawson, T.E., Richards, J.H., 1998. Hydraulic lift: consequences of water efflux  
690 from the roots of plants. *Oecologia* 113, 151–161. doi:10.1007/s004420050363
- 691 Celik, G.Y., Aslim, B., Beyatli, Y., 2008. Characterization and production of the  
692 exopolysaccharide (EPS) from *Pseudomonas aeruginosa* G1 and *Pseudomonas putida*  
693 G12 strains. *Carbohydrate Polymers* 73, 178–182. doi:10.1016/j.carbpol.2007.11.021
- 694 Chang, W.-S., Mortel, M. van de, Nielsen, L., Guzman, G.N. de, Li, X., Halverson, L.J., 2007.  
695 Alginate Production by *Pseudomonas putida* Creates a Hydrated Microenvironment and

- 696           Contributes to Biofilm Architecture and Stress Tolerance under Water-Limiting  
697           Conditions. *Journal of Bacteriology* 189, 8290–8299. doi:10.1128/JB.00727-07
- 698 Cheng, W., Gershenson, A., 2007. CHAPTER 2 - Carbon Fluxes in the Rhizosphere, in:  
699           Cardon, Z.G., Whitbeck, J.L. (Eds.), *The Rhizosphere*. Academic Press, Burlington, pp.  
700           31–56. doi:10.1016/B978-012088775-0/50004-5
- 701 Chenu, C., 1995. Extracellular Polysaccharides: An Interface between Microorganisms and Soil  
702           Constituents, in: Huang, P.M., Berthelin, J., Bollag, J.-M., McGill, W.B. (Eds.),  
703           *Environmental Impacts of Soil Component Interactions: Land Quality, Natural and*  
704           *Anthropogenic Organics, Volume I. Presented at the Impact of interactions of inorganic,*  
705           *organic, and microbiological soil components on environmental quality, Edmonton,*  
706           *Alberta, Canada, pp. 217–233.*
- 707 Chenu, C., 1993. Clay- or sand-polysaccharide associations as models for the interface  
708           between micro-organisms and soil: water related properties and microstructure.  
709           *Geoderma, International Workshop on Methods of Research on Soil Structure/Soil Biota*  
710           *Interrelationships* 56, 143–156. doi:10.1016/0016-7061(93)90106-U
- 711 Chenu, C., Plante, A.T., 2006. Clay-sized organo-mineral complexes in a cultivation  
712           chronosequence: Revisiting the concept of the “primary organo-mineral complex.”  
713           *European Journal of Soil Science* 57, 596–607. doi:10.1111/j.1365-2389.2006.00834.x
- 714 Chenu, C., Roberson, E.B., 1996. Diffusion of glucose in microbial extracellular polysaccharide  
715           as affected by water potential. *Soil Biology and Biochemistry* 28, 877–884.  
716           doi:10.1016/0038-0717(96)00070-3
- 717 Cheshire, M.V., 1979. *Nature and Origin of Carbohydrates in Soils*. Academic Press, London,  
718           UK.
- 719 Cheshire, M.V., 1977. Origins and Stability of Soil Polysaccharide. *Journal of Soil Science* 28,  
720           1–10. doi:10.1111/j.1365-2389.1977.tb02290.x
- 721 Chimento, C., Almagro, M., Amaducci, S., 2016. Carbon sequestration potential in perennial  
722           bioenergy crops: the importance of organic matter inputs and its physical protection.  
723           *GCB Bioenergy* 8, 111–121. doi:10.1111/gcbb.12232
- 724 Costa, O.Y.A., Raaijmakers, J.M., Kuramae, E.E., 2018. Microbial Extracellular Polymeric  
725           Substances: Ecological Function and Impact on Soil Aggregation. *Frontiers in*  
726           *Microbiology* 9. doi:10.3389/fmicb.2018.01636
- 727 D’Angelo, E., Crutchfield, J., Vandiviere, M., 2001. Rapid, Sensitive, Microscale Determination  
728           of Phosphate in Water and Soil. *Journal of Environmental Quality* 30, 2206–2209.  
729           doi:10.2134/jeq2001.2206
- 730 Dou, F.G., Hons, F.M., Ocumpaugh, W.R., Read, J.C., Hussey, M.A., Muir, J.P., 2013. Soil  
731           Organic Carbon Pools Under Switchgrass Grown as a Bioenergy Crop Compared to  
732           Other Conventional Crops. *Pedosphere* 23, 409–416. doi:10.1016/S1002-  
733           0160(13)60033-8
- 734 DuBois, Michel., Gilles, K.A., Hamilton, J.K., Rebers, P.A., Smith, Fred., 1956. Colorimetric  
735           Method for Determination of Sugars and Related Substances. *Analytical Chemistry* 28,  
736           350–356. doi:10.1021/ac60111a017
- 737 Epskamp, S., 2019. *semPlot: Path Diagrams and Visual Analysis of Various SEM Packages’*  
738           *Output*.
- 739 Fox, J., Weisberg, S., 2011. *An R companion to applied regression, 2nd ed. ed.* SAGE  
740           Publications, Thousand Oaks, Calif.
- 741 Frølund, B., Palmgren, R., Keiding, K., Nielsen, P.H., 1996. Extraction of extracellular polymers  
742           from activated sludge using a cation exchange resin. *Water Research* 30, 1749–1758.  
743           doi:10.1016/0043-1354(95)00323-1
- 744 Gelfand, I., Zenone, T., Jasrotia, P., Chen, J., Hamilton, S.K., Robertson, G.P., 2011. Carbon  
745           debt of Conservation Reserve Program (CRP) grasslands converted to bioenergy  
746           production. *Proceedings of the National Academy of Sciences* 108, 13864–13869.  
747           doi:10.1073/pnas.1017277108

- 748 Ghosh, S., Ghosh, P., Saha, P., Maiti, T.K., 2011. The extracellular polysaccharide produced by  
749 *Rhizobium* sp. isolated from the root nodules of *Phaseolus mungo*. *Symbiosis* 53, 75.  
750 doi:10.1007/s13199-011-0109-3
- 751 Gunina, A., Kuzyakov, Y., 2015. Sugars in soil and sweets for microorganisms: Review of origin,  
752 content, composition and fate. *Soil Biology and Biochemistry* 90, 87–100.  
753 doi:10.1016/j.soilbio.2015.07.021
- 754 Hall-Stoodley, L., Costerton, J.W., Stoodley, P., 2004. Bacterial biofilms: from the Natural  
755 environment to infectious diseases. *Nature Reviews Microbiology* 2, 95.  
756 doi:10.1038/nrmicro821
- 757 Idowu, O.J., 2003. Relationships Between Aggregate Stability and Selected Soil Properties in  
758 Humid Tropical Environment. *Communications in Soil Science and Plant Analysis* 34,  
759 695–708. doi:10.1081/CSS-120018969
- 760 Jackson, R.B., Mooney, H.A., Schulze, E.-D., 1997. A global budget for fine root biomass,  
761 surface area, and nutrient contents. *Proceedings of the National Academy of Sciences*  
762 94, 7362–7366. doi:10.1073/pnas.94.14.7362
- 763 Jastrow, J.D., Amonette, J.E., Bailey, V.L., 2007. Mechanisms controlling soil carbon turnover  
764 and their potential application for enhancing carbon sequestration. *Climatic Change* 80,  
765 5–23. doi:10.1007/s10584-006-9178-3
- 766 Jastrow, J.D., Miller, R.M., Lussenhop, J., 1998. Contributions of interacting biological  
767 mechanisms to soil aggregate stabilization in restored prairie1The submitted manuscript  
768 has been created by the University of Chicago as operator of Argonne National  
769 Laboratory under Contract No. W-31-109-ENG-38 with the U.S. Department of Energy.1.  
770 *Soil Biology and Biochemistry* 30, 905–916. doi:10.1016/S0038-0717(97)00207-1
- 771 Jenkins, S., Swenson, T.L., Lau, R., Rocha, A.M., Aaring, A., Hazen, T.C., Chakraborty, R.,  
772 Northen, T.R., 2017. Construction of Viable Soil Defined Media Using Quantitative  
773 Metabolomics Analysis of Soil Metabolites. *Frontiers in Microbiology* 8.  
774 doi:10.3389/fmicb.2017.02618
- 775 Jiao, Y., Cody, G.D., Harding, A.K., Wilmes, P., Schrenk, M., Wheeler, K.E., Banfield, J.F.,  
776 Thelen, M.P., 2010. Characterization of extracellular polymeric substances from  
777 acidophilic microbial biofilms. *Applied and Environmental Microbiology* 76, 2916–2922.  
778 doi:10.1128/AEM.02289-09
- 779 Joergensen, R.G., Mueller, T., Wolters, V., 1996. Total carbohydrates of the soil microbial  
780 biomass in 0.5 M K<sub>2</sub>SO<sub>4</sub> soil extracts. *Soil Biology and Biochemistry* 28, 1147–1153.  
781 doi:10.1016/0038-0717(96)00111-3
- 782 Kemper, W.D., Rosenau, R.C., 1986. Aggregate Stability and Size Distribution, in: *Methods of*  
783 *Soil Analysis, Part 1. Physical and Mineralogical Methods* (2nd Edition), pp. 425–442.
- 784 Kirkham, M.B., 2005. 19 - The Ascent of Water in Plants, in: Kirkham, M.B. (Ed.), *Principles of*  
785 *Soil and Plant Water Relations*. Academic Press, Burlington, pp. 315–340.  
786 doi:10.1016/B978-012409751-3/50019-0
- 787 Liang, C., Schimel, J.P., Jastrow, J.D., 2017. The importance of anabolism in microbial control  
788 over soil carbon storage. *Nature Microbiology* 2, 1–6. doi:10.1038/nmicrobiol.2017.105
- 789 Liao, J.D., Boutton, T.W., Jastrow, J.D., 2006. Organic matter turnover in soil physical fractions  
790 following woody plant invasion of grassland: Evidence from natural <sup>13</sup>C and <sup>15</sup>N. *Soil*  
791 *Biology and Biochemistry, Ecosystems in Flux: Molecular and stable isotope*  
792 *Assessments of Soil Organic Matter Storage and Dynamics* 38, 3197–3210.  
793 doi:10.1016/j.soilbio.2006.04.004
- 794 Ma, Z., Wood, C.W., Bransby, D.I., 2000. Soil management impacts on soil carbon  
795 sequestration by switchgrass. *Biomass and Bioenergy* 18, 469–477. doi:10.1016/S0961-  
796 9534(00)00013-1
- 797 Mao, Y., Li, X., Smyth, E.M., Yannarell, A.C., Mackie, R.I., 2014. Enrichment of specific  
798 bacterial and eukaryotic microbes in the rhizosphere of switchgrass (*Panicum virgatum*)

- 799 L.) through root exudates. *Environmental Microbiology Reports* 6, 293–306.  
800 doi:10.1111/1758-2229.12152
- 801 Marchus, K.A., Blankinship, J.C., Schimel, J.P., 2018. Environmental controls on extracellular  
802 polysaccharide accumulation in a California grassland soil. *Soil Biology and*  
803 *Biochemistry* 125, 86–92. doi:10.1016/j.soilbio.2018.07.009
- 804 Martin, J., 1946. *Microorganisms and Soil Aggregation*. *Soil Science* 61, 157–166.
- 805 McGowan, A.R., Min, D.-H., Williams, J.R., Rice, C.W., 2018. Impact of Nitrogen Application  
806 Rate on Switchgrass Yield, Production Costs, and Nitrous Oxide Emissions. *Journal of*  
807 *Environmental Quality* 47, 228–237. doi:10.2134/jeq2017.06.0226
- 808 McGowan, A.R., Nicoloso, R.S., Diop, H.E., Roozeboom, K.L., Rice, C.W., 2019. Soil Organic  
809 Carbon, Aggregation, and Microbial Community Structure in Annual and Perennial  
810 Biofuel Crops. *Agronomy Journal* 111, 128–142. doi:10.2134/agronj2018.04.0284
- 811 McLauchlan, K.K., Hobbie, S.E., Post, W.M., 2006. Conversion From Agriculture To Grassland  
812 Builds Soil Organic Matter On Decadal Timescales. *Ecological Applications* 16, 143–  
813 153. doi:10.1890/04-1650
- 814 Moffatt, H.H., 1973. *Soil Survey of Caddo County, Oklahoma*. United States Department of  
815 Agriculture Soil Conservation Service, Washington, D.C.
- 816 More, T.T., Yadav, J.S.S., Yan, S., Tyagi, R.D., Surampalli, R.Y., 2014. Extracellular polymeric  
817 substances of bacteria and their potential environmental applications. *Journal of*  
818 *Environmental Management* 144, 1–25. doi:10.1016/j.jenvman.2014.05.010
- 819 Nicolaus, B., Kambourova, M., Oner, E.T., 2010. Exopolysaccharides from extremophiles: From  
820 fundamentals to biotechnology. *Environmental Technology* 31, 1145–1158.  
821 doi:10.1080/09593330903552094
- 822 Oades, J.M., 1984. Soil organic matter and structural stability: mechanisms and implications for  
823 management. *Plant and Soil* 76, 319–337. doi:10.1007/BF02205590
- 824 O'Brien, S.L., Jastrow, J.D., 2013. Physical and chemical protection in hierarchical soil  
825 aggregates regulates soil carbon and nitrogen recovery in restored perennial grasslands.  
826 *Soil Biology and Biochemistry* 61, 1–13. doi:10.1016/j.soilbio.2013.01.031
- 827 Ontl, T.A., Cambardella, C.A., Schulte, L.A., Kolka, R.K., 2015. Factors influencing soil  
828 aggregation and particulate organic matter responses to bioenergy crops across a  
829 topographic gradient. *Geoderma* 255–256, 1–11. doi:10.1016/j.geoderma.2015.04.016
- 830 Ontl, T.A., Hofmockel, K.S., Cambardella, C.A., Schulte, L.A., Kolka, R.K., 2013. Topographic  
831 and soil influences on root productivity of three bioenergy cropping systems. *New*  
832 *Phytologist* 727–737. doi:10.1111/nph.12302@10.1002/(ISSN)1469-  
833 8137(CAT)VirtualIssues(VI)ScalingRootProcessesGlobalImpacts
- 834 Ophir, T., Gutnick, D.L., 1994. A Role for Exopolysaccharides in the Protection of  
835 Microorganisms from Desiccation. *Appl. Environ. Microbiol.* 60, 740–745.
- 836 Or, D., Smets, B.F., Wraith, J.M., Dechesne, A., Friedman, S.P., 2007. Physical constraints  
837 affecting bacterial habitats and activity in unsaturated porous media – a review.  
838 *Advances in Water Resources*, Biological processes in porous media: From the pore  
839 scale to the field 30, 1505–1527. doi:10.1016/j.advwatres.2006.05.025
- 840 Pal, A., Paul, A.K., 2013. Optimization of Cultural Conditions for Production of Extracellular  
841 Polymeric Substances (EPS) by Serpentine Rhizobacterium *Cupriavidus pauculus* KPS  
842 201 [WWW Document]. *Journal of Polymers*. doi:10.1155/2013/692374
- 843 Parrish, D.J., Fike, J.H., 2005. The Biology and Agronomy of Switchgrass for Biofuels. *Critical*  
844 *Reviews in Plant Sciences* 24, 423–459. doi:10.1080/07352680500316433
- 845 Pedroso, G., De Ben, C., Hutmacher, R., Orloff, S., Putnam, D., Six, J., van Kessel, C., Wright,  
846 S., Linnquist, B., 2011. Switchgrass is a promising, high-yielding crop for California  
847 biofuel. *California Agriculture* 65, 168–173.
- 848 Petersen, D.G., Blazewicz, S.J., Firestone, M., Herman, D.J., Turetsky, M., Waldrop, M., 2012.  
849 Abundance of microbial genes associated with nitrogen cycling as indices of



- 850 biogeochemical process rates across a vegetation gradient in Alaska. *Environmental*  
851 *Microbiology* 14, 993–1008. doi:10.1111/j.1462-2920.2011.02679.x
- 852 Peterson, B.G., Carl, P., Boudt, K., Bennett, R., Ulrich, J., Zivot, E., Cornilly, D., Hung, E.,  
853 Lestel, M., Balkissoon, K., Wuertz, D., 2018. PerformanceAnalytics: Econometric Tools  
854 for Performance and Risk Analysis.
- 855 Pett-Ridge, J., Firestone, M.K., 2017. Using stable isotopes to explore root-microbe-mineral  
856 interactions in soil. *Rhizosphere, New Understanding of Rhizosphere Processes*  
857 *Enabled by Advances in Molecular and Spatially Resolved Techniques* 3, 244–253.  
858 doi:10.1016/j.rhisph.2017.04.016
- 859 Quelas, J.I., López-García, S.L., Casabuono, A., Althabegoiti, M.J., Mongiardini, E.J., Pérez-  
860 Giménez, J., Couto, A., Lodeiro, A.R., 2006. Effects of N-starvation and C-source on  
861 *Bradyrhizobium japonicum* exopolysaccharide production and composition, and bacterial  
862 infectivity to soybean roots. *Archives of Microbiology* 186, 119–128. doi:10.1007/s00203-  
863 006-0127-3
- 864 R Core Team, 2018. R: A Language and Environment for Statistical Computing. R Foundation  
865 for Statistical Computing, Vienna, Austria.
- 866 Redmile-Gordon, M.A., Brookes, P.C., Evershed, R.P., Goulding, K.W.T., Hirsch, P.R., 2014.  
867 Measuring the soil-microbial interface: Extraction of extracellular polymeric substances  
868 (EPS) from soil biofilms. *Soil Biology and Biochemistry* 72, 163–171.  
869 doi:10.1016/j.soilbio.2014.01.025
- 870 Redmile-Gordon, M.A., Evershed, R.P., Hirsch, P.R., White, R.P., Goulding, K.W.T., 2015. Soil  
871 organic matter and the extracellular microbial matrix show contrasting responses to C  
872 and N availability. *Soil Biology and Biochemistry* 88, 257–267.  
873 doi:10.1016/j.soilbio.2015.05.025
- 874 Rinot, O., Levy, G.J., Steinberger, Y., Svoray, T., Eshel, G., 2019. Soil health assessment: A  
875 critical review of current methodologies and a proposed new approach. *Science of The*  
876 *Total Environment* 648, 1484–1491. doi:10.1016/j.scitotenv.2018.08.259
- 877 Roberson, E.B., 1991. Extracellular polysaccharide production by soil bacteria : environmental  
878 control and significance in agricultural soil. University of California, Berkeley.
- 879 Roberson, E.B., Firestone, M.K., 1992. Relationship between desiccation and  
880 exopolysaccharide production in a soil *Pseudomonas* sp. *Applied and Environmental*  
881 *Microbiology* 58, 1284–1291.
- 882 Roberson, E.B., Shennan, C., Firestone, M.K., Sarig, S., 1995. Nutritional Management of  
883 Microbial Polysaccharide Production and Aggregation in an Agricultural Soil. *Soil*  
884 *Science Society of America Journal* 59, 1587–1594.  
885 doi:10.2136/sssaj1995.03615995005900060012x
- 886 Robertson, G.P., Groffman, P.M., 2015. Chapter 14 - Nitrogen Transformations, in: Paul, E.A.  
887 (Ed.), *Soil Microbiology, Ecology and Biochemistry (Fourth Edition)*. Academic Press,  
888 Boston, pp. 421–446. doi:10.1016/B978-0-12-415955-6.00014-1
- 889 Robertson, G.P., Hamilton, S.K., Barham, B.L., Dale, B.E., Izaurrealde, R.C., Jackson, R.D.,  
890 Landis, D.A., Swinton, S.M., Thelen, K.D., Tiedje, J.M., 2017. Cellulosic biofuel  
891 contributions to a sustainable energy future: Choices and outcomes. *Science* 356,  
892 eaal2324. doi:10.1126/science.aal2324
- 893 Rodrigues, R.R., Moon, J., Zhao, B., Williams, M.A., 2017. Microbial communities and  
894 diazotrophic activity differ in the root-zone of Alamo and Dacotah switchgrass  
895 feedstocks. *GCB Bioenergy* 9, 1057–1070. doi:10.1111/gcbb.12396
- 896 Rogers, S.L., Burns, R.G., 1994. Changes in aggregate stability, nutrient status, indigenous  
897 microbial populations, and seedling emergence, following inoculation of soil with *Nostoc*  
898 *muscorum*. *Biology and Fertility of Soils* 18, 209–215. doi:10.1007/BF00647668
- 899 Rosseel, Y., 2012. lavaan: An R Package for Structural Equation Modeling. *Journal of Statistical*  
900 *Software* 48, 1–36.

- 901 Ruan, L., Bhardwaj, A.K., Hamilton, S.K., Robertson, G.P., 2016. Nitrogen fertilization  
902 challenges the climate benefit of cellulosic biofuels. *Environmental Research Letters* 11,  
903 064007. doi:10.1088/1748-9326/11/6/064007
- 904 Russell, A.E., Kivlin, S.N., Hawkes, C.V., 2018. Tropical Tree Species Effects on Soil pH and  
905 Biotic Factors and the Consequences for Macroaggregate Dynamics. *Forests* 9, 184.  
906 doi:10.3390/f9040184
- 907 Sandhya, V., Ali, Sk.Z., 2015. The production of exopolysaccharide by *Pseudomonas putida*  
908 GAP-P45 under various abiotic stress conditions and its role in soil aggregation.  
909 *Microbiology* 84, 512–519. doi:10.1134/S0026261715040153
- 910 Schimel, J.P., 2018. Life in Dry Soils: Effects of Drought on Soil Microbial Communities and  
911 Processes. *Annual Review of Ecology, Evolution, and Systematics* 49, 409–432.  
912 doi:10.1146/annurev-ecolsys-110617-062614
- 913 Seki, K., 2007. SWRC fit &ndash; a nonlinear fitting program with a water retention curve for  
914 soils having unimodal and bimodal pore structure. *Hydrology and Earth System*  
915 *Sciences Discussions* 4, 407–437. doi:<https://doi.org/10.5194/hessd-4-407-2007>
- 916 Sheng, G.-P., Yu, H.-Q., Li, X.-Y., 2010. Extracellular polymeric substances (EPS) of microbial  
917 aggregates in biological wastewater treatment systems: A review. *Biotechnology*  
918 *Advances* 28, 882–894. doi:10.1016/j.biotechadv.2010.08.001
- 919 Sheng, G.P., Yu, H.Q., Yue, Z., 2006. Factors influencing the production of extracellular  
920 polymeric substances by *Rhodopseudomonas acidophila*. *International Biodeterioration*  
921 *& Biodegradation, Surface Adhesion and Biotechnological Applications* 58, 89–93.  
922 doi:10.1016/j.ibiod.2006.07.005
- 923 Shipley, B., 2016. Cause and correlation biology users guide path analysis structural equations  
924 and causal inference r 2nd edition | Ecology and co, 2nd ed. Cambridge university press.
- 925 Singer, M.J., Southard, R.J., Warrington, D.N., Janitzky, P., 1992. Stability of Synthetic Sand-  
926 Clay Aggregates after Wetting and Drying Cycles. *Soil Science Society of America*  
927 *Journal* 56, 1843–1848. doi:10.2136/sssaj1992.03615995005600060032x
- 928 Six, J., Conant, R.T., Paul, E.A., Paustian, K., 2002. Stabilization mechanisms of soil organic  
929 matter: Implications for C-saturation of soils. *Plant and Soil* 241, 155–176.  
930 doi:10.1023/A:1016125726789
- 931 Six, J., Elliott, E.T., Paustian, K., 2000. Soil macroaggregate turnover and microaggregate  
932 formation: a mechanism for C sequestration under no-tillage agriculture. *Soil Biology and*  
933 *Biochemistry* 32, 2099–2103. doi:10.1016/S0038-0717(00)00179-6
- 934 Six, J., Paustian, K., 2014. Aggregate-associated soil organic matter as an ecosystem property  
935 and a measurement tool. *Soil Biology and Biochemistry* 68, A4–A9.  
936 doi:10.1016/j.soilbio.2013.06.014
- 937 Sollins, P., Homann, P., Caldwell, B.A., 1996. Stabilization and destabilization of soil organic  
938 matter: mechanisms and controls. *Geoderma* 74, 65–105. doi:10.1016/S0016-  
939 7061(96)00036-5
- 940 Staudt, A.K., Wolfe, L.G., Shrout, J.D., 2012. Variations in exopolysaccharide production by  
941 *Rhizobium tropici*. *Archives of Microbiology* 194, 197–206. doi:10.1007/s00203-011-  
942 0742-5
- 943 Steinberger, R.E., Holden, P.A., 2004. Macromolecular composition of unsaturated  
944 *Pseudomonas aeruginosa* biofilms with time and carbon source. *Biofilms* 1, 37–47.  
945 doi:10.1017/S1479050503001066
- 946 Thomason, W.E., Raun, W.R., Johnson, G.V., Taliaferro, C.M., Freeman, K.W., Wynn, K.J.,  
947 Mullen, R.W., 2005. Switchgrass Response to Harvest Frequency and Time and Rate of  
948 Applied Nitrogen. *Journal of Plant Nutrition* 27, 1199–1226. doi:10.1081/PLN-120038544
- 949 Tiemann, L.K., Grandy, A.S., 2015. Mechanisms of soil carbon accrual and storage in bioenergy  
950 cropping systems. *GCB Bioenergy* 7, 161–174. doi:10.1111/gcbb.12126
- 951 Tilman, D., Hill, J., Lehman, C., 2006. Carbon-Negative Biofuels from Low-Input High-Diversity  
952 Grassland Biomass. *Science* 314, 1598–1600. doi:10.1126/science.1133306



- 953 Tisdall, J.M., Oades, J.M., 1982. Organic matter and water-stable aggregates in soils. *Journal of*  
954 *Soil Science* 33, 141–163. doi:10.1111/j.1365-2389.1982.tb01755.x
- 955 Upadhyay, S., S Singh, J., Singh, D.P., 2011. Exopolysaccharide-Producing Plant Growth-  
956 Promoting Rhizobacteria Under Salinity Condition. *Pedosphere* 21, 214–222.
- 957 Venables, W.N., Ripley, B.D., 2002. *Modern applied statistics with S*, 4th ed. ed, Statistics and  
958 computing. Springer, New York.
- 959 Vogel, K.P., Brejda, J.J., Walters, D.T., Buxton, D.R., 2002. Switchgrass Biomass Production in  
960 the Midwest USA. *Agronomy Journal* 94, 413–420. doi:10.2134/agronj2002.0413
- 961 Wang, J., Yu, H.-Q., 2007. Biosynthesis of polyhydroxybutyrate (PHB) and extracellular  
962 polymeric substances (EPS) by *Ralstonia eutropha* ATCC 17699 in batch cultures.  
963 *Applied Microbiology and Biotechnology* 75, 871–878. doi:10.1007/s00253-007-0870-7
- 964 Wang, S., Redmile-Gordon, M., Mortimer, M., Cai, P., Wu, Y., Peacock, C.L., Gao, C., Huang,  
965 Q., 2019. Extraction of extracellular polymeric substances (EPS) from red soils (Ultisols).  
966 *Soil Biology and Biochemistry* 135, 283–285. doi:10.1016/j.soilbio.2019.05.014
- 967 Wickham, H., 2016. *ggplot2: elegant graphics for data analysis*, Second edition. ed, Use R!  
968 Springer, Cham.
- 969 Wolfaardt, G.M., Lawrence, J.R., Korber, D.R., 1999. Function of EPS, in: Wingender, J., Neu,  
970 T.R., Flemming, H.-C. (Eds.), *Microbial Extracellular Polymeric Substances*. Springer.
- 971 Yeats, T.H., Sorek, H., Wemmer, D.E., Somerville, C.R., 2016. Cellulose Deficiency Is  
972 Enhanced on Hyper Accumulation of Sucrose by a H<sup>+</sup>-Coupled Sucrose Symporter.  
973 *Plant Physiology* 171, 110–124. doi:10.1104/pp.16.00302
- 974 Zhalnina, K., Louie, K.B., Hao, Z., Mansoori, N., Rocha, U.N. da, Shi, S., Cho, H., Karaoz, U.,  
975 Loqué, D., Bowen, B.P., Firestone, M.K., Northen, T.R., Brodie, E.L., 2018. Dynamic  
976 root exudate chemistry and microbial substrate preferences drive patterns in rhizosphere  
977 microbial community assembly. *Nature Microbiology* 3, 470. doi:10.1038/s41564-018-  
978 0129-3
- 979 Zhang, Q., Yan, T., 2012. Correlation of Intracellular Trehalose Concentration with Desiccation  
980 Resistance of Soil *Escherichia coli* Populations. *Appl. Environ. Microbiol.* 78, 7407–  
981 7413. doi:10.1128/AEM.01904-12
- 982 Zhu, S., Vivanco, J.M., Manter, D.K., 2016. Nitrogen fertilizer rate affects root exudation, the  
983 rhizosphere microbiome and nitrogen-use-efficiency of maize. *Applied Soil Ecology* 107,  
984 324–333. doi:10.1016/j.apsoil.2016.07.009
- 985 Zuur, A.F., Ieno, E.N., Elphick, C.S., 2010. A protocol for data exploration to avoid common  
986 statistical problems. *Methods in Ecology and Evolution* 1, 3–14. doi:10.1111/j.2041-  
987 210X.2009.00001.x
- 988

## TABLES

**Table 1:** Multiple linear regression models describing relations between most highly explanatory soil factors and EPS, after removing collinear explanatory soil factors with variance inflation factor values above 3 (Zuur et al., 2010).

| Factor                                 | Root biomass         |                  |              |                  | Soil water potential* |               | Dissolved nitrogen |              | Microbial biomass |                  | pH            |              |
|----------------------------------------|----------------------|------------------|--------------|------------------|-----------------------|---------------|--------------------|--------------|-------------------|------------------|---------------|--------------|
|                                        | Model R <sup>2</sup> | Model P          | $\beta^{\S}$ | P                | $\beta$               | P             | $\beta$            | P            | $\beta$           | P                | $\beta$       | P            |
| All horizons                           | <b>0.799</b>         | <b>&lt;0.001</b> | <b>0.676</b> | <b>0.010</b>     | <b>0.973</b>          | <b>0.034</b>  | <b>0.102</b>       | <b>0.011</b> | <b>0.631</b>      | <b>&lt;0.001</b> | —             | —            |
| A horizon                              | <b>0.667</b>         | <b>&lt;0.001</b> | <b>1.001</b> | <b>&lt;0.001</b> | <b>1.038</b>          | <b>0.007</b>  | —                  | —            | —                 | —                | <b>-3.087</b> | <b>0.009</b> |
| A horizon; Controlled for N treatments | <b>0.655</b>         | <b>&lt;0.001</b> | <b>0.977</b> | <b>&lt;0.001</b> | <b>0.995</b>          | <b>0.0170</b> | —                  | —            | —                 | —                | -2.611        | 0.198        |

\* Absolute value soil water potential units

<sup>\S</sup> Factor specific slope when other factors are constant

## FIGURES

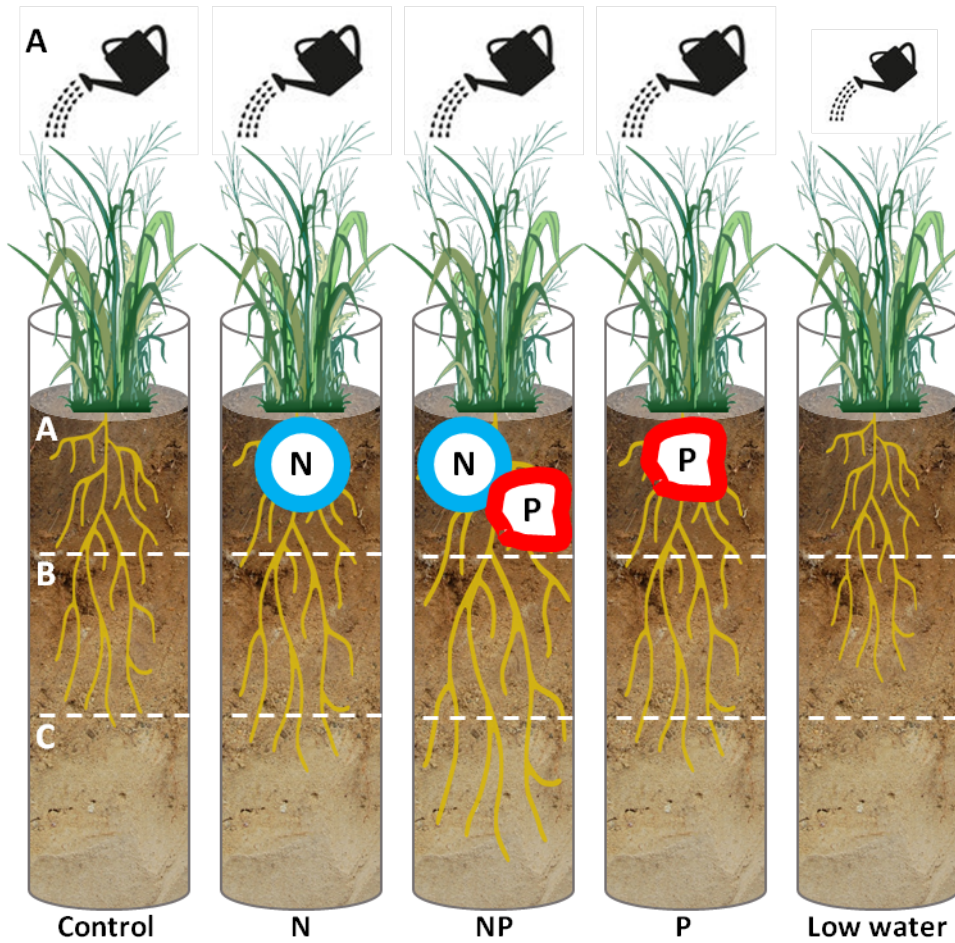

B

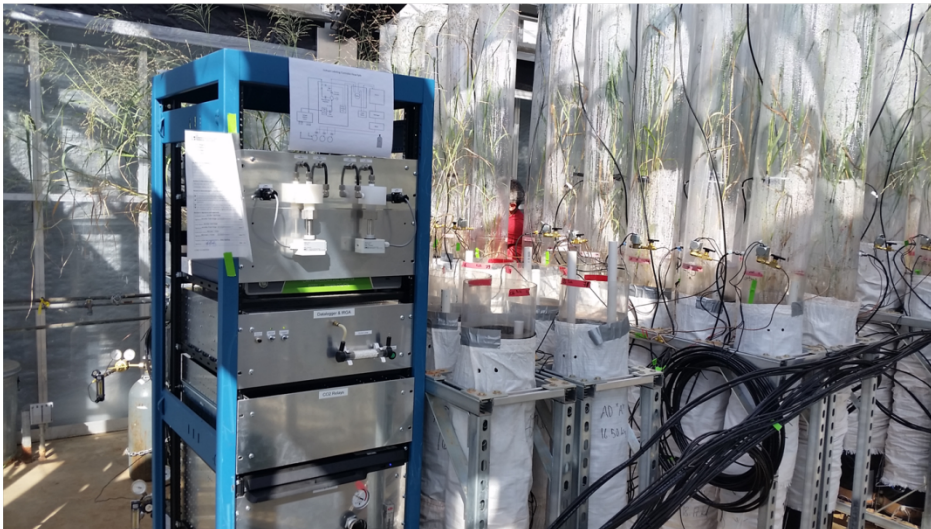

**Figure 1.**  $^{13}\text{CO}_2$  labeling greenhouse experiment designed to test the effects of N and P fertilization and soil water on switchgrass growth, microbial communities and soil properties. A) Schematic of experimental design - switchgrass mesocosms contained three soil horizons (A, B, and C) reconstituted in 1.22 m cylinders, with the A horizon subject to either no treatment

(control), nitrogen fertilization by 44-0-0 coated urea (N), phosphorus fertilization by 0-3-3 rock phosphate (P), both nitrogen and phosphorus fertilization (NP) or a 50% reduced watering regime (Low water). Each treatment had 6 replicates, 3 of which were labeled with  $^{13}\text{CO}_2$  and 3 of which were labeled with  $^{13}\text{CO}_2$ , for a total of 30 mesocosms. B) A picture of the greenhouse experimental setup showing mesocosms with planted SG, attached labeling chambers and delivery system, and the  $^{13}\text{C}/^{12}\text{C}$   $\text{CO}_2$  gas flow and concentration control panel.

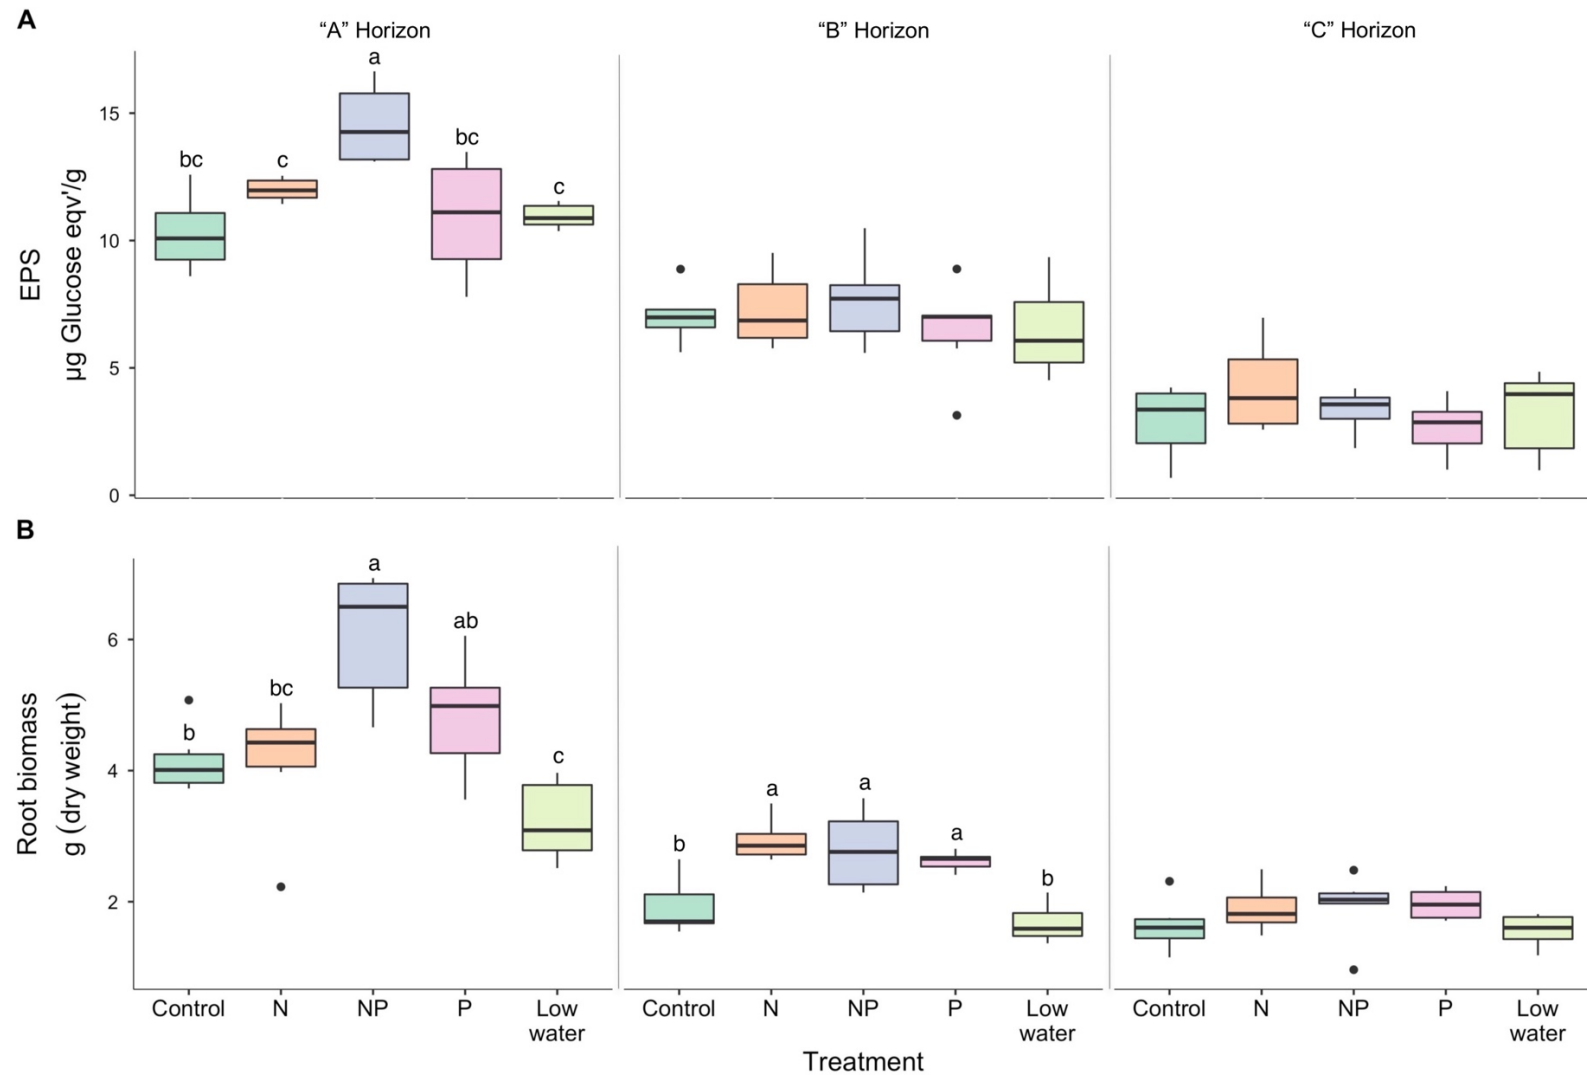

**Figure 2.** EPS and root biomass in switchgrass (SG) microcosms with five fertilizer/moisture treatments and three soil horizons after 140 days of growth. Box-whisker plots of A) EPS content (glucose equivalent, micrograms per gram dry soil) and B) SG root biomass (grams dry weight) recovered from bulk soil by treatment and horizon. Lowercase letters indicate significant differences between treatments within a horizon (Welch's t-test  $P < 0.05$ , after Benjamini-Hochberg correction for multiple testing).  $n = 6$  per treatment/horizon.

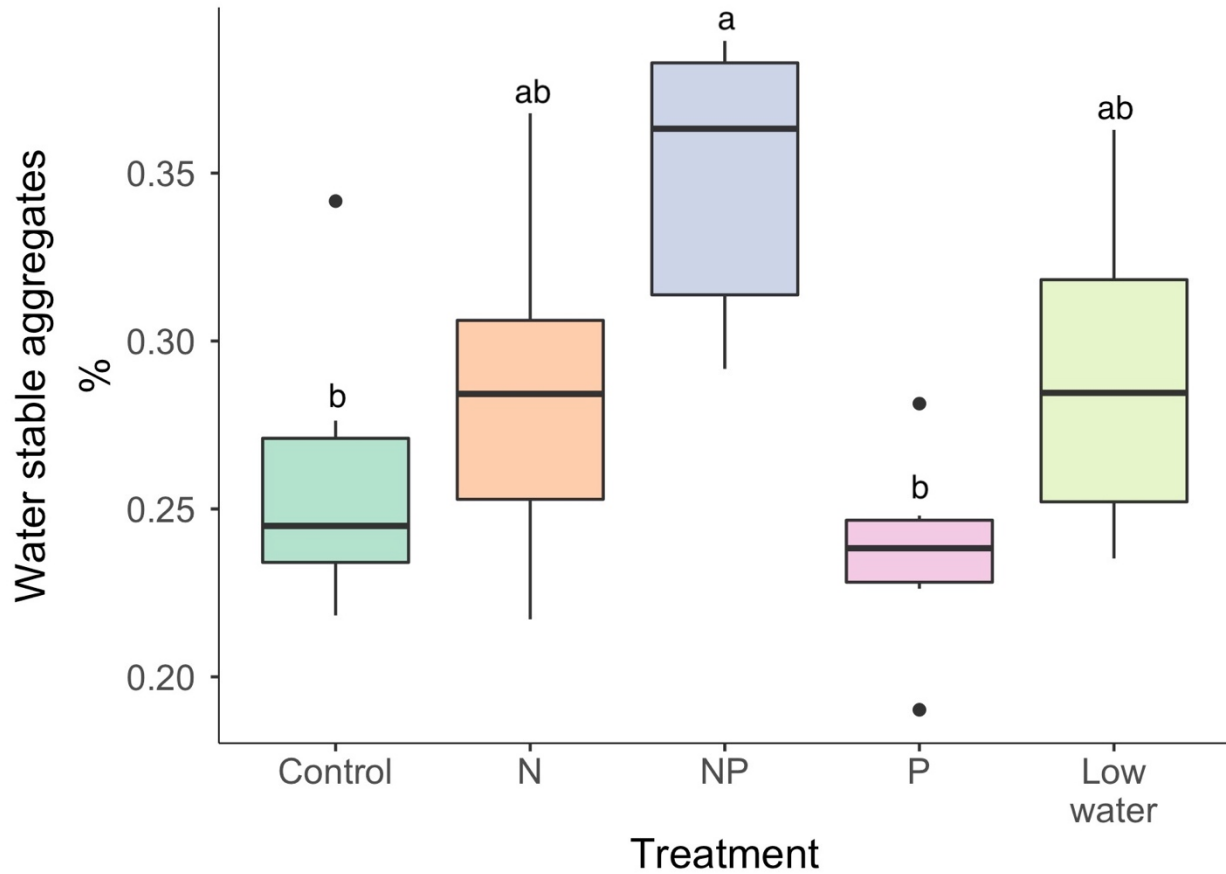

**Figure 3.** Soil aggregate stability in the surface horizon of switchgrass (SG) mesocosms with five fertilizer/moisture treatments after 140 days of growth. Box-whisker plot of the percentage of aggregates recovered from bulk soil that were water-stable in the A horizon. Lowercase letters indicate significant differences between treatments (Welch's t-test  $P < 0.05$ , after Benjamini-Hochberg correction for multiple testing).  $n = 6$  per treatment.



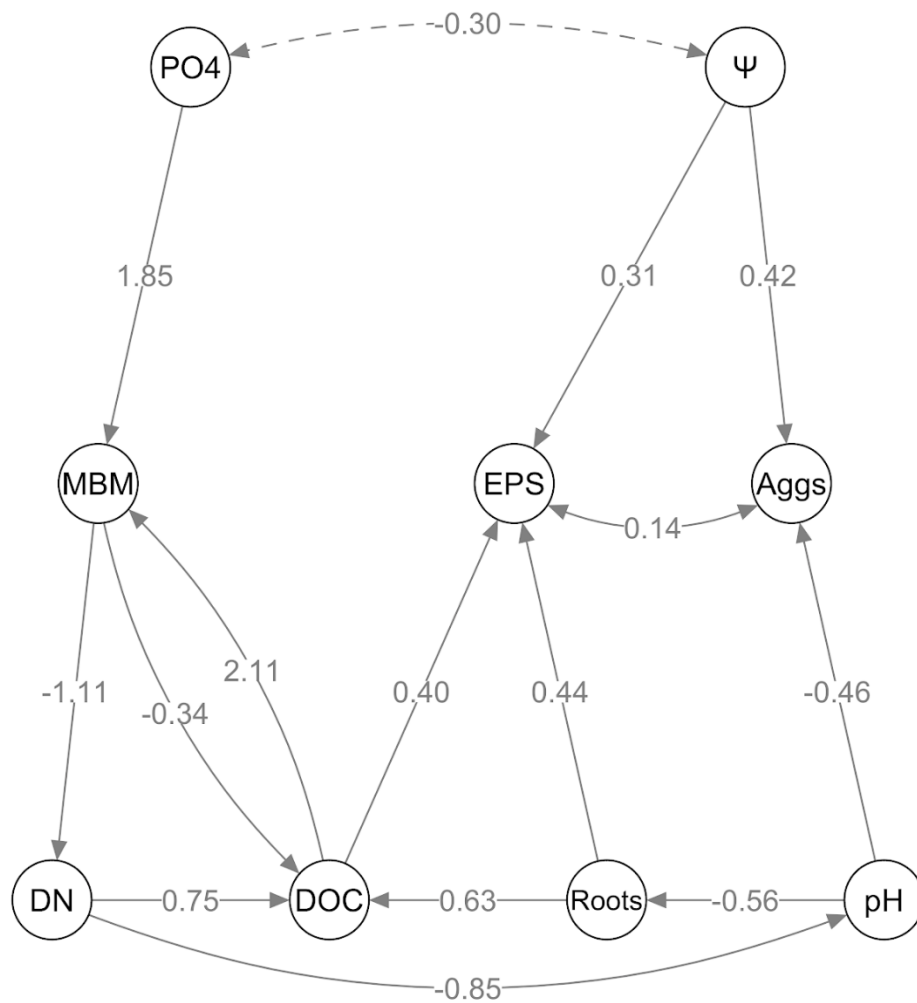

**Figure 4.** Path analysis of soil factors affecting EPS and soil aggregate stability in the surface soil horizon of SG mesocosms with five fertilizer/moisture treatments after 140 days of growth in a 'reduced model', where only significant edges ( $P < 0.05$ ) are retained. Node labels correspond to the following measured variables: EPS content (EPS), frequency of water-stable aggregates (Aggs), soil water potential ( $\Psi$ ), pH, SG root biomass (Roots), dissolved organic carbon (DOC), total dissolved nitrogen (DN), microbial biomass measured by PLFA (MBM), and phosphate accumulation on anion exchange membranes over the course of the study (PO4).

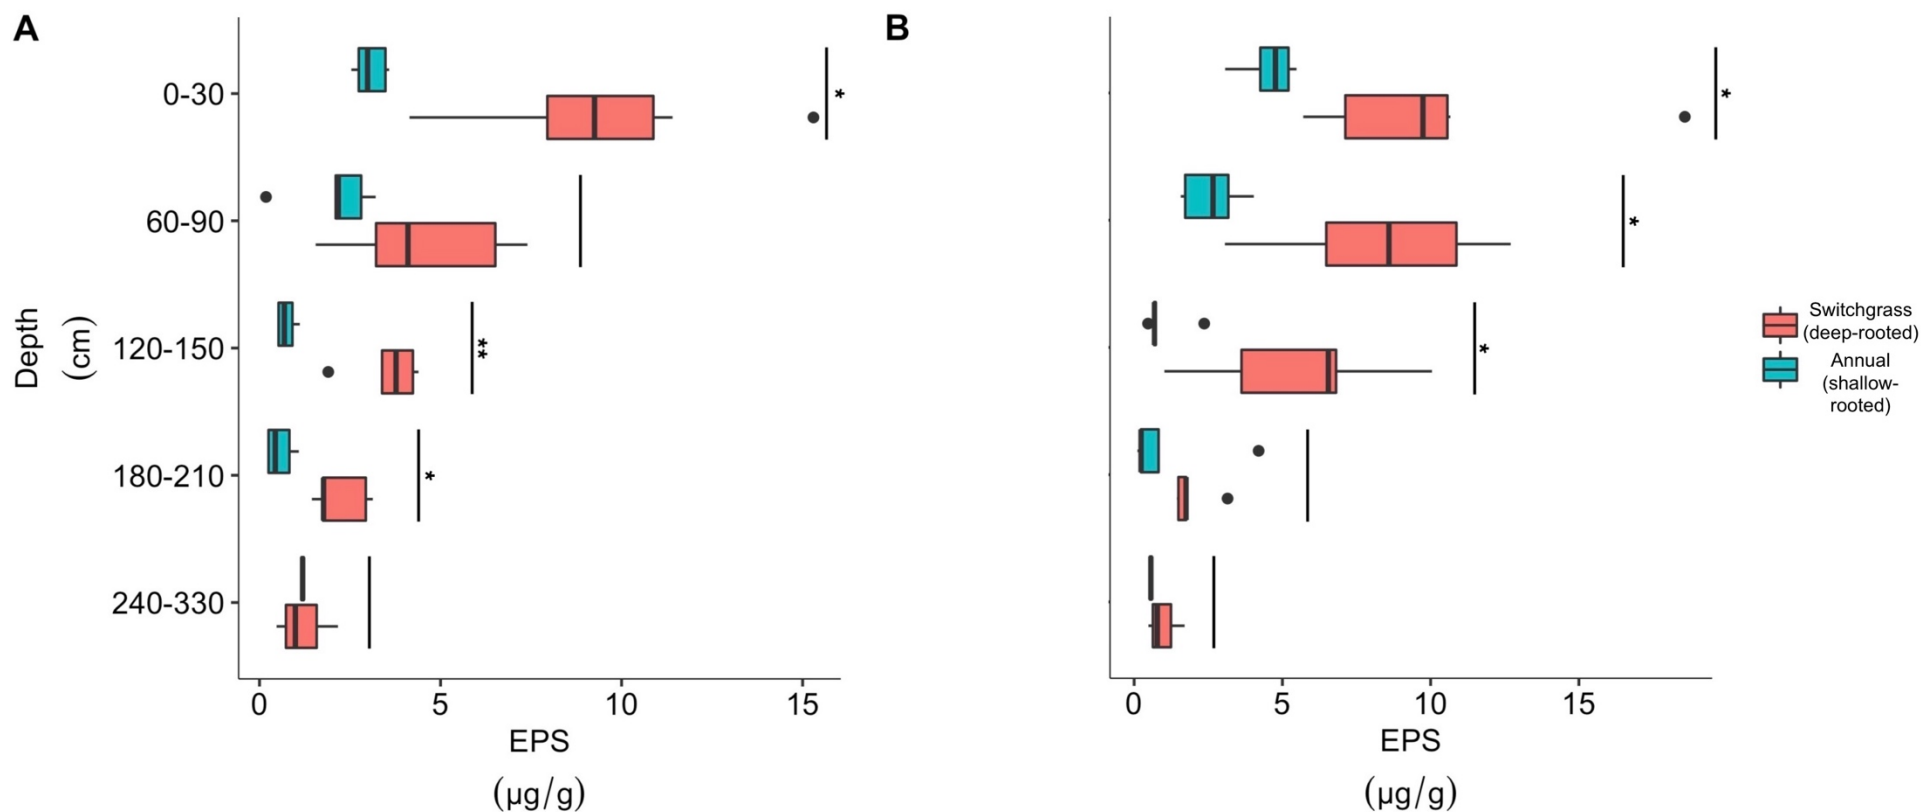

**Figure 5.** Soil depth profile of EPS content in switchgrass (SG) and annual crop fields. Box-whisker plots of EPS content (glucose equivalent micrograms per gram dry soil) in deep soil cores from plots subjected to A) 20-year (Stillwater, OK) and B) 10-year (Red River site, OK) no-till cultivation of deep-rooted SG compared to paired plots at each site planted with short-rooted annual rye or wheat/sorghum and managed with annual tillage. Asterisks indicate significant differences between deep-rooted Switchgrass plots compared to paired annual plots at each sampled depth (Welch's t-test,  $P < 0.05$  for \* and  $< 0.01$  for \*\*, after Benjamini-Hochberg correction for multiple testing).  $n = 6$ .
